# Supplementary material
Source: PubMed Central journal article supplement (PMC7118575)
Supplement: mmc4.pdf [file mmc4.pdf]

## De Novo Truncating Variants in the Last Exon of *SEMA6B* Cause Progressive Myoclonic Epilepsy

Kohei Hamanaka,<sup>1,12</sup> Eri Imagawa,<sup>1,12</sup> Eriko Koshimizu,<sup>1,12</sup> Satoko Miyatake,<sup>1</sup> Jun Tohyama,<sup>2</sup> Takanori Yamagata,<sup>3</sup> Akihiko Miyauchi,<sup>3</sup> Nina Ekhilevitch,<sup>4</sup> Fumio Nakamura,<sup>5</sup> Takeshi Kawashima,<sup>6</sup> Yoshio Goshima,<sup>6</sup> Ahmad Rithauddin Mohamed,<sup>7</sup> Gaik-Siew Ch'ng,<sup>8</sup> Atsushi Fujita,<sup>1</sup> Yoshiteru Azuma,<sup>1</sup> Ken Yasuda,<sup>9</sup> Shintaro Imamura,<sup>10</sup> Mitsuko Nakashima,<sup>11</sup> Hiroto Saito,<sup>11</sup> Satomi Mitsuhashi,<sup>1</sup> Takeshi Mizuguchi,<sup>1</sup> Atsushi Takata,<sup>1</sup> Noriko Miyake,<sup>1</sup> and Naomichi Matsumoto<sup>1,\*</sup>

*De novo* variants (DNVs) cause many genetic diseases. When DNVs are examined in the whole coding regions of genes in next-generation sequencing analyses, pathogenic DNVs often cluster in a specific region. One such region is the last exon and the last 50 bp of the penultimate exon, where truncating DNVs cause escape from nonsense-mediated mRNA decay [NMD(–) region]. Such variants can have dominant-negative or gain-of-function effects. Here, we first developed a resource of rates of truncating DNVs in NMD(–) regions under the null model of DNVs. Utilizing this resource, we performed enrichment analysis of truncating DNVs in NMD(–) regions in 346 developmental and epileptic encephalopathy (DEE) trios. We observed statistically significant enrichment of truncating DNVs in semaphorin 6B (*SEMA6B*) (p value:  $2.8 \times 10^{-8}$ ; exome-wide threshold:  $2.5 \times 10^{-6}$ ). The initial analysis of the 346 individuals and additional screening of 1,406 and 4,293 independent individuals affected by DEE and developmental disorders collectively identified four truncating DNVs in the *SEMA6B* NMD(–) region in five individuals who came from unrelated families (p value:  $1.9 \times 10^{-13}$ ) and consistently showed progressive myoclonic epilepsy. RNA analysis of lymphoblastoid cells established from an affected individual showed that the mutant allele escaped NMD, indicating stable production of the truncated protein. Importantly, heterozygous truncating variants in the NMD(+) region of *SEMA6B* are observed in general populations, and *SEMA6B* is most likely loss-of-function tolerant. Zebrafish expressing truncating variants in the NMD(–) region of *SEMA6B* orthologs displayed defective development of brain neurons and enhanced pentylentetrazole-induced seizure behavior. In summary, we show that truncating DNVs in the final exon of *SEMA6B* cause progressive myoclonic epilepsy.

Whole-exome sequencing (WES) has allowed for the comprehensive identification of *de novo* variants (DNVs) in gene coding regions as pathogenic causes for many genetic diseases. The ongoing reduction in sequencing costs has enabled recent WES studies to incorporate increasingly large numbers of individuals, sometimes more than 10,000.<sup>1</sup> However, pathogenic causes remain unidentified in the majority of individuals.<sup>1,2</sup> The simplest way to identify such rare undiscovered causes would be to increase the sample sizes of future studies; however, improvement in the sensitivity of the analytical method is always beneficial.

WES analyzes many genes at once; therefore, a sophisticated statistical framework is required for the identification of *bona fide* disease-causing variants and DNVs. One popular approach is to calculate the probability of the observed number of DNVs in a gene of interest by referring to the theoretical DNV rate. Samocha et al.<sup>3</sup> developed a null model that takes tri-nucleotide context into consideration to provide gene-specific DNV probabilities of each variant type (e.g. nonsense, missense, etc.). This valuable resource

for enrichment analysis of DNVs has been widely used in large-scale analyses of DNVs.<sup>2,4–6</sup>

In this model, all coding regions are weighted equally in a calculation of a per-gene DNV probability. However, in the real world, a specific type of DNV in a specific region can cause a rare disease. For example, truncating DNVs in the last exon and in the last 50 bp of the penultimate exon of a gene [hereafter termed the NMD(–) region] can cause disease. Such DNVs likely cause the transcript to escape nonsense-mediated mRNA decay (NMD).<sup>7,8</sup> Diseases can also result from missense DNVs at constrained coding regions.<sup>9</sup> Focusing on specific combinations of variant type and areas of a coding region should increase the sensitivity of enrichment analysis. Such analysis is predicted to identify disease-causative variants that conventional analyses do not.

Here, we focused on truncating DNVs in the NMD(–) region of each gene and performed enrichment analysis in our cohort of developmental and epileptic encephalopathy (DEE). Consequently, we identified truncating DNVs at

<sup>1</sup>Department of Human Genetics, Yokohama City University Graduate School of Medicine, Yokohama 236-0004, Japan; <sup>2</sup>Department of Pediatrics, National Hospital Organization Nishi-Niigata Chuo National Hospital, Niigata 950-2085, Japan; <sup>3</sup>Department of Pediatrics, Jichi Medical University, Tochigi 329-0498, Japan; <sup>4</sup>The Genetics Institute, Rambam Health Care Campus, Haifa 3109601, Israel; <sup>5</sup>Department of Biochemistry, Tokyo Women's Medical University, Tokyo 162-8666, Japan; <sup>6</sup>Department of Molecular Pharmacology and Neurobiology, Yokohama City University Graduate School of Medicine, Yokohama 236-0004, Japan; <sup>7</sup>Department of Pediatric Neurology Unit, Pediatric Institute, Hospital Kuala Lumpur, Kuala Lumpur, Malaysia; <sup>8</sup>Department of Genetics, Hospital Kuala Lumpur, Kuala Lumpur, Malaysia; <sup>9</sup>Department of Neurology, Kyoto University Graduate School of Medicine, Kyoto 606-8507, Japan; <sup>10</sup>Research Center for Biochemistry and Food Technology, National Research Institute of Fisheries Science, Yokohama 236-8648, Japan; <sup>11</sup>Department of Biochemistry, Hamamatsu University School of Medicine, Hamamatsu, Shizuoka 431-3192, Japan

<sup>12</sup>These authors contributed equally to this work

\*Correspondence: [naomat@yokohama-cu.ac.jp](mailto:naomat@yokohama-cu.ac.jp)

<https://doi.org/10.1016/j.ajhg.2020.02.011>

© 2020 American Society of Human Genetics.

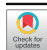

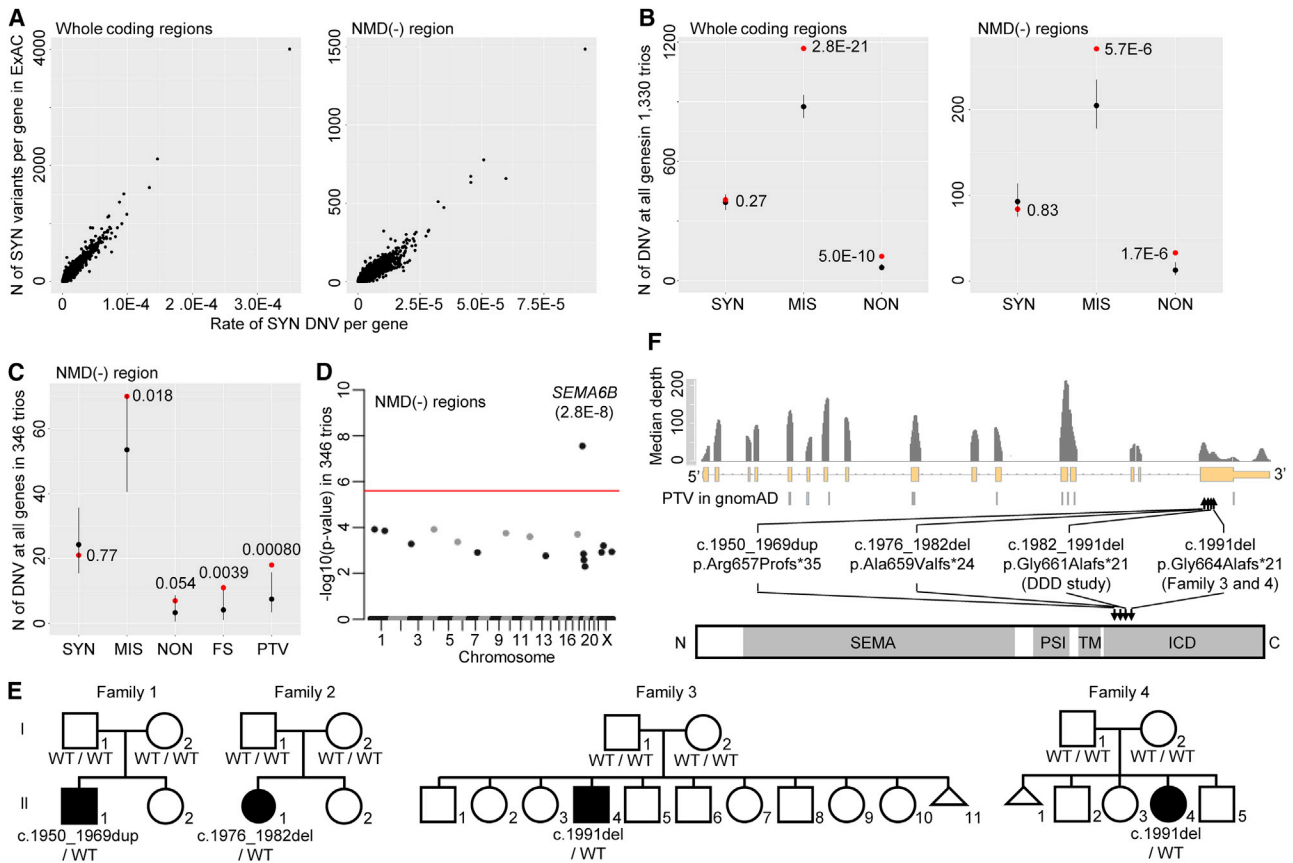

**Figure 1. Enrichment of Truncating DNVs in the NMD(-) Region of *SEMA6B* in 346 DEE Trios**

(A) Correlation between the observed number of synonymous variants in ExAC and the expected rate of synonymous DNVs by the trinucleotide-context-based model at each of 20,042 genes. Whole coding regions (left) and NMD(-) regions (right) were analyzed. (B) Expected and observed numbers of synonymous, missense, and nonsense DNVs in 20,042 genes in 1,330 trios with variable rare diseases. *p* values are shown above dots and were calculated as the probability of the observed number or more in a Poisson distribution of  $\lambda$  (mean) of expected number. Black and red dots: expected and observed numbers of DNVs, respectively. Error bar: 95% CI of the Poisson distribution. (C) Expected and observed numbers of synonymous, nonsense, frameshift, and truncating (nonsense+frameshift) DNVs in NMD(-) regions in 346 DEE trios. Statistical testing and figure presentation are as in Figure 1B. (D) Manhattan plot showing enrichment of truncating DNVs in NMD(-) regions of each gene in 346 DEE trios. Statistical testing is performed as in Figure 1C but is applied to each gene. The red line shows a threshold for Bonferroni-corrected exome-wide statistical significance ( $0.05/20,042$ ). (E) Pedigrees of the four families with truncating DNVs in the NMD(-) region of *SEMA6B* from 346 DEE trios and 1,406 independent individuals. Information for the other family from the DDD study was unavailable. The *SEMA6B* genotype is described below each member. WT: wild-type allele. (F) Locations of truncating DNVs in *SEMA6B* identified in this study or in the “non-neuro” subset of gnomAD in the gene (middle) and encoded protein (lower). Median per-base depth at exons and flanking 20 bp of 100 randomly selected samples sequenced with V5 kit are shown (upper). Domains are shown as gray bars. Abbreviations are as follows: SEMA, Sema domain; PSI, plexin-semaphorin-integrin domain; TM, transmembrane domain; and ICD, intracellular domain.

(A, B, C, and F) Abbreviations are as follows: SYN, synonymous variant; MIS, missense variant; NON, nonsense variant; FS, frameshift indel; and PTV, protein-truncating variant.

(A, B, C, and F) Abbreviations are as follows: SYN, synonymous variant; MIS, missense variant; NON, nonsense variant; FS, frameshift indel; and PTV, protein-truncating variant.

(A, B, C, and F) Abbreviations are as follows: SYN, synonymous variant; MIS, missense variant; NON, nonsense variant; FS, frameshift indel; and PTV, protein-truncating variant.

the last exon of semaphorin 6B (*SEMA6B*) (MIM: 608873) as a genetic cause of progressive myoclonic epilepsy (PME). Notably, the gene would be missed by conventional enrichment analysis. DNV rates in the NMD(-) region of each gene are available (Tables S1 and S2). This study was approved by the institutional review board of Yokohama City University School of Medicine (Yokohama, Japan). Written informed consent was obtained from all children’s parents.

First, we confirmed that the previous trinucleotide-context-based model of DNV rate could predict the DNV rate in NMD(-) regions.<sup>3</sup> Because the DNV rate for a

genomic interval under no natural selection is correlated with the number of variant sites in the interval (Figure S1, see Supplemental Note), we intended to show a correlation between the DNV rate expected by the model and the number of variant sites in the NMD(-) region of each gene. After we adjusted the DNV rate predicted by the model for depth,<sup>10</sup> which affects variant detection (Figure S2A, see Supplemental Methods), we observed a high Pearson’s correlation coefficient ( $r = 0.97$ ) between the observed number of synonymous variants and the expected rate of synonymous DNVs in the whole coding

region of each gene (Figure 1A, left), as previously described.<sup>3</sup> Similarly, we observed a high correlation ( $r = 0.94$ ) in NMD(–) regions of each gene (Figure 1A, right). This result indicates that the trinucleotide-context-based model provided accurate relative rates of DNVs among the NMD(–) regions.

Next, we confirmed that the model could predict a total absolute rate of DNVs in the NMD(–) regions of all genes. We performed WES, as previously described,<sup>11</sup> on 1,330 trios in which the parents were healthy and their child showed variable rare diseases. We expected that number of synonymous DNVs observed in the 1,330 trios would be comparable to that expected from the model, whereas numbers of missense or nonsense DNVs would be higher than expected. After we optimized our flow for DNV detection (see Supplemental Note) and adjusted the DNV rate expected from the model for depth (Figure S2B, see Supplemental Methods), we confirmed that the expected and observed numbers of synonymous DNVs were comparable in the 1,330 trios, whereas the observed numbers of missense and nonsense DNVs were higher than expected ( $p$ : 0.27 for synonymous,  $2.8 \times 10^{-21}$  for missense, and  $5.0 \times 10^{-10}$  for nonsense, Figure 1B). This was also the case for NMD(–) regions ( $p$ : 0.83 for synonymous,  $5.7 \times 10^{-6}$  for missense, and  $1.7 \times 10^{-6}$  for nonsense, Figure 1B). These results indicate that the model predicted a total absolute rate of DNVs in the NMD(–) regions of all genes. Together with the above finding (Figure 1A), these results indicate that the trinucleotide-context-based model predicts an accurate absolute rate of DNVs in the NMD(–) region of each gene.

Using the DNV rate in NMD(–) regions, we performed enrichment analysis of DNVs in NMD(–) regions in 346 trios in which attending physicians diagnosed the child as having DEE and the parents were healthy.<sup>12</sup> After optimizing our workflow of DNV detection (see Supplemental Materials and Methods “Variant filtering and *de novo* calling,” Figure S3), we observed statistically significant enrichment for truncating (nonsense and frameshift) DNVs ( $p = 8.0 \times 10^{-4}$ ) in all genes but no enrichment for synonymous DNVs ( $p = 0.77$ ) (Figure 1C). We then performed enrichment analysis for truncating DNVs in the NMD(–) region of each gene (Table S3). One gene, *SEMA6B*, exceeded the Bonferroni-corrected exome-wide statistical significance threshold ( $p = 2.8 \times 10^{-8}$ ; observed number: 2, expected number: 0.000237, Figure 1C). A causal association between *SEMA6B* and DEE has not previously been reported. The observed DNVs were as follows: c.1976\_1982del (p.Ala659Valfs\*24) and c.1991del (p.Gly664Alafs\*21). We then screened for truncating DNVs in the NMD(–) region of *SEMA6B* in WES data of an additional 1,406 independent individuals with DEE. We identified two frameshift DNVs, c.1950\_1969dup (p.Arg657Profs\*35) and c.1991del, the latter being identical to one of the variants found through the initial analysis of the 346 trios. We also screened for truncating DNVs in the NMD(–) region of *SEMA6B* in the Deciphering

Developmental Disorders (DDD) cohort, which comprises 4,293 trios with developmental disorders<sup>2</sup> that often involve epilepsy. This analysis identified another truncating DNV, c.1982\_1991del (p.Gly661Alafs\*21). Thus, we identified four truncating DNVs in the NMD(–) region of *SEMA6B* in five unrelated families from among 1,752 DEE- (346 + 1,406) and 4,293 DDD-affected individuals. Collectively, the statistical significance was  $1.9 \times 10^{-13}$  when we used a non-depth-adjusted DNV rate (observed number: 5; expected number: 0.0075, see the “Per-gene enrichment analysis of DNVs” section of Supplemental Materials and Methods) because information about the depth of the 4,293 trios in the DDD cohort was unavailable. This statistical analysis using non-depth-adjusted rate is more conservative than that using depth-adjusted rate because the analysis assumes sufficient depth in all the regions analyzed and expects a higher number of DNVs. On the other hand, no DNVs at the NMD(+) region of *SEMA6B* were observed in the 346 DEE and 4,293 DDD trios after filtering DNVs with scoring systems used in each dataset. We confirmed all variants from our four families by Sanger sequencing (Figure 1E); the DNA samples from the one family from the DDD study was unavailable for confirmatory sequencing.

All four variants occurred in the last exon of *SEMA6B* and lead to truncation of the intracellular domain (ICD), the region closer to the C terminus than the transmembrane domain (InterPro database, Figure 1F).<sup>13</sup> Truncating variants in the NMD(–) region of *SEMA6B* were not observed in general populations (i.e., the “non-neuro” subset of gnomAD), except for one at the extreme C terminus, whereas truncating variants were observed in the NMD(+) region (Figure 1F). *SEMA6B* has a low probability of being loss-of-function intolerant ( $pLI = 0.06$ ). We investigated whether the variants induce NMD in a lymphoblastoid cell line of individual 2 (individual II-1 of family 2, Figure 1E), which was the only cell line available to us among all the individuals. Sanger sequencing of real-time PCR-amplified *SEMA6B* transcripts confirmed a mutant-allele peak in the electropherogram, whose intensity was comparable to that of the wild-type allele (Figure S4), indicating that the DNV was unlikely to induce NMD. Collectively, these results indicate that the pathomechanism of truncating DNVs in the NMD(–) region of *SEMA6B* was most likely dominant-negative or gain-of-function, but not haploinsufficiency.

We retrospectively investigated the phenotypes of the affected individuals (Supplemental Note and Table 1; note that the clinical information available for individual 3, individual 4, and the individual from the DDD study was limited). Their summarized clinical courses were as follows. Developmental milestones were mildly delayed but apparently normal until 2 years. Epilepsy started from the age of 1 year 5 months until about 6 years. Regression started from 2–4 years in individual 3 and individual 4, whereas its precise commencing time in individual 1 and individual 2 was unknown. The affected individuals were

**Table 1. Clinical Findings in Four Affected Individuals with Truncating Variants in the NMD(-) Region of SEMA6B**

|                               | Individual 1                                                                                                                                                                                    | Individual 2                                                                                                                                                                                                                                                                                                                                                | Individual 3                                                                                                  | Individual 4                                                                                                                                                                                                       |
|-------------------------------|-------------------------------------------------------------------------------------------------------------------------------------------------------------------------------------------------|-------------------------------------------------------------------------------------------------------------------------------------------------------------------------------------------------------------------------------------------------------------------------------------------------------------------------------------------------------------|---------------------------------------------------------------------------------------------------------------|--------------------------------------------------------------------------------------------------------------------------------------------------------------------------------------------------------------------|
| Current age                   | 22 years                                                                                                                                                                                        | 28 years                                                                                                                                                                                                                                                                                                                                                    | 14 years                                                                                                      | 11 years                                                                                                                                                                                                           |
| Sex                           | male                                                                                                                                                                                            | female                                                                                                                                                                                                                                                                                                                                                      | male                                                                                                          | female                                                                                                                                                                                                             |
| Nationality                   | Japanese                                                                                                                                                                                        | Japanese                                                                                                                                                                                                                                                                                                                                                    | Israeli                                                                                                       | Malaysian                                                                                                                                                                                                          |
| Mutation                      | c.1950_1969dup                                                                                                                                                                                  | c.1976_1982del                                                                                                                                                                                                                                                                                                                                              | c.1991del                                                                                                     | c.1991del                                                                                                                                                                                                          |
| Protein change                | p.Arg657Profs*35                                                                                                                                                                                | p.Ala659Valfs*24                                                                                                                                                                                                                                                                                                                                            | p.Gly664Alafs*21                                                                                              | p.Gly664Alafs*21                                                                                                                                                                                                   |
| Inheritance                   | <i>de novo</i>                                                                                                                                                                                  | <i>de novo</i>                                                                                                                                                                                                                                                                                                                                              | <i>de novo</i>                                                                                                | <i>de novo</i>                                                                                                                                                                                                     |
| Age at onset                  | 6 years                                                                                                                                                                                         | 11 months                                                                                                                                                                                                                                                                                                                                                   | 2 years                                                                                                       | 4 years                                                                                                                                                                                                            |
| Development milestones        | rolling over: 12 months; meaningful words: 24–36 months                                                                                                                                         | walking without support: 28 months                                                                                                                                                                                                                                                                                                                          | walking without support: 24 months                                                                            | eye pursuit, 5 months; walking without support, 24 months; meaningful words, 30 months;                                                                                                                            |
| Initial symptom               | seizure, developmental delay                                                                                                                                                                    | seizure                                                                                                                                                                                                                                                                                                                                                     | seizure                                                                                                       | seizure and developmental delay,                                                                                                                                                                                   |
| Initial walking               | 1 year 5 months                                                                                                                                                                                 | 2 years 4 months                                                                                                                                                                                                                                                                                                                                            | 2 years                                                                                                       | 2 years,                                                                                                                                                                                                           |
| Intellectual disability       | severe (IQ = 25 at 17 years)                                                                                                                                                                    | severe (IQ = 25 at 12 years)                                                                                                                                                                                                                                                                                                                                | severe                                                                                                        | severe                                                                                                                                                                                                             |
| Language                      | few words                                                                                                                                                                                       | few words                                                                                                                                                                                                                                                                                                                                                   | no words                                                                                                      | few words                                                                                                                                                                                                          |
| Microcephaly                  | –                                                                                                                                                                                               | + (–2.0 SD)                                                                                                                                                                                                                                                                                                                                                 | + (–2.5 SD)                                                                                                   | + (2 <sup>nd</sup> percentile)                                                                                                                                                                                     |
| Seizure type at onset         | GTCS since 6 years, absence seizure since 9 years, atonic seizure since 11 years                                                                                                                | GTCS since 11 months; loss of consciousness with abnormal eye movement since 5 years; complex partial seizure since 10 years; atonic seizure since 10 years,                                                                                                                                                                                                | absence seizure since 2 years                                                                                 | atonic seizure since 4 years                                                                                                                                                                                       |
| Response to therapy (seizure) | intractable                                                                                                                                                                                     | intractable                                                                                                                                                                                                                                                                                                                                                 | responsive                                                                                                    | intractable, but improved by clobazam and sulthiame (responsive)                                                                                                                                                   |
| Regression                    | + (motor skill and dysarthria)                                                                                                                                                                  | + (motor skill)                                                                                                                                                                                                                                                                                                                                             | + (motor and verbal skills)                                                                                   | +                                                                                                                                                                                                                  |
| Ataxia                        | +                                                                                                                                                                                               | +                                                                                                                                                                                                                                                                                                                                                           | +                                                                                                             | +                                                                                                                                                                                                                  |
| Intention tremor              | +                                                                                                                                                                                               | +                                                                                                                                                                                                                                                                                                                                                           | +                                                                                                             | +                                                                                                                                                                                                                  |
| Rigidity                      | +                                                                                                                                                                                               | +                                                                                                                                                                                                                                                                                                                                                           | ND                                                                                                            | ND                                                                                                                                                                                                                 |
| Myoclonus                     | +                                                                                                                                                                                               | +                                                                                                                                                                                                                                                                                                                                                           | ND                                                                                                            | +                                                                                                                                                                                                                  |
| Spasticity                    | +                                                                                                                                                                                               | +                                                                                                                                                                                                                                                                                                                                                           | ND                                                                                                            | ND                                                                                                                                                                                                                 |
| Increased deep tendon reflex  | + (upper and lower limbs)                                                                                                                                                                       | + (upper and lower limbs)                                                                                                                                                                                                                                                                                                                                   | ND                                                                                                            | –                                                                                                                                                                                                                  |
| Pathogenic reflex             | + (Rossolimo sign; positive, Mendel-Bechterew sign; positive)                                                                                                                                   | –                                                                                                                                                                                                                                                                                                                                                           | ND                                                                                                            | –                                                                                                                                                                                                                  |
| Dysmorphic features           | –                                                                                                                                                                                               | –                                                                                                                                                                                                                                                                                                                                                           | –                                                                                                             | –                                                                                                                                                                                                                  |
| Motor disturbance             | wheelchair                                                                                                                                                                                      | wheelchair                                                                                                                                                                                                                                                                                                                                                  | wheelchair                                                                                                    | walking with support                                                                                                                                                                                               |
| Brain MRI                     | normal                                                                                                                                                                                          | mild cerebellar atrophy;                                                                                                                                                                                                                                                                                                                                    | small vermis                                                                                                  | normal                                                                                                                                                                                                             |
| EEG                           | abnormal discharge in right hemisphere (6 years); burst of diffuse irregular spikes and slow waves (9 years); diffuse spike and slow waves in frontal, parietal and temporal regions (14 years) | diffuse slow wave with 2–3 Hz and spike-and-wave in bilateral frontal region (3 years and 4 years); diffuse theta waves with 4–5 Hz and spike-and-wave burst with 2–3 Hz (9 years); multifocal spikes in left parietal region and bilateral frontal regions (12 years); multispikes in left occipital region (13 years); slow waves at baselines (23 years) | abnormal background activity (1 year); slow abnormal sleep features with paucity of sleep spindles (13 years) | focal bifrontal epileptiform discharges accentuated during sleep (4 years); frequent frontocentral discharges during awake state (5 years); frequent intermittent slow spikes in right posterior region (11 years) |

(Continued on next page)

**Table 1. Continued**

|                | Individual 1                                                     | Individual 2 | Individual 3 | Individual 4 |
|----------------|------------------------------------------------------------------|--------------|--------------|--------------|
| SEP            | prolonged N20 latency and giant SEP<br>high amplitude of P24-N33 |              | ND           | ND           |
| Other findings | ND                                                               | SLE          | ND           | ND           |

*SEMA6B* variants are based on GenBank: NM\_032108.4. Abbreviations are as follows: EEG, electroencephalogram; GTCS, generalized tonic-clonic seizures; ND, not described; MRI, magnetic resonance imaging; SEP, somatosensory evoked potential; SLE, systemic lupus erythematosus; +, present; and –, not present.

wheelchair bound or only walked with support at 10–14 years. They could communicate with a few words—perhaps two-word sentences—or could not communicate at 14–28 years. The types of epilepsy were generalized tonic-clonic seizure (GTCS) in individual 1 and individual 2, absence seizure in individual 1 and individual 3, and atonic seizure in individual 1, individual 2, and individual 4. Microcephaly was recognized in individual 2, individual 3, and individual 4. Additional neurological findings included extrapyramidal symptoms (rigidity and/or myoclonus) in individual 1, individual 2, and individual 4; pyramidal-tract signs (spasticity, increased deep tendon reflex, and/or pathological reflex) in individual 1 and individual 2; and cerebellar findings (ataxia, intention tremor, and/or mild cerebellar atrophy on MRI) in all four individuals. Somatosensory evoked potential (SEP) tests showed high amplitudes of P24 and N33 electrical potentials in individual 1 and giant SEP in individual 2. The findings such as myoclonus, epileptic seizures, and progressive neurologic decline indicated that the affected individuals had PME with phenotypic consistency, indicating a shared etiology among the individuals.<sup>14</sup> Clinically, pyramidal-tract signs indicate cerebral cortex layer 5 (L5) excitatory neurons, abnormal SEP<sup>15,16</sup> indicates the primary somatosensory cortex, and cerebellar findings indicate variable types of cerebellar neurons.<sup>17</sup>

Next, we investigated relationships between the observed phenotypes and the expression patterns of *SEMA6B* across different brain regions. We analyzed *Sema6b* *in situ* hybridization (ISH) data in the post-natal day (P)56, P14, and P4 and embryonic day (E)18.5 mouse brain in the Allen Brain Atlas.<sup>18</sup> *Sema6b* was expressed broadly in the brain at P56 and P14 (Figure S5A, left). All layers of the cerebral cortex and the Purkinje cell layer of the cerebellum (Purkinje cells and/or Bergmann glia) were stained (Figure S5A, middle and right). At P4, *Sema6b* was expressed in L5 and L6 of the frontal region (Figure S5A, P4, left) and in the cortical plate that will form L2 to L4 in later developmental stages (Figure S5A, P4). In the cerebellum, the Purkinje cell layer (migrating Purkinje cells, Bergmann glia, interneurons, and/or granule cells) was stained. At E18.5, *Sema6b* was expressed in the subplate and cortical plate, which forms L2 to L6 in later stages (Figure S5A, E18.5). In the E18.5 cerebellum, the outer part of Purkinje cell clusters (migrating Purkinje cells, Bergmann glia, interneurons, and/or granule cells) was stained (within the black dotted outline, Figure S5A, E18.5). We also analyzed two single-cell RNA sequencing

(scRNA-seq) datasets: one from P2 and P11 mouse brains<sup>19</sup> and the other from P12–P60 mouse brains<sup>20</sup> (Figure S5B, Tables S4 and S5). The cell type was determined in the original analyses,<sup>19,20</sup> and additionally, we confirmed this by using Allen Brain Atlas ISH data (Table S4 and S5).<sup>18</sup> In P12–P60 mouse brains, *Sema6b* was expressed in excitatory neurons in the cerebral cortex and in cerebellar Purkinje cells (Figure S5B, left). P2 and P11 mouse brains showed a similar pattern (Figure S5B, right). We also analyzed *SEMA6B* expression in human brain tissue: bulk RNA-seq data of variable brain regions at variable developmental stages in the BrainSpan Atlas of the Developing Human Brain and single-nucleus RNA-seq (snRNA-seq) of variable regions of the adult brain in the Allen Brain Map. The bulk RNA-seq showed broad expression of *SEMA6B* at variable brain regions across variable developmental stages, especially at infantile periods (Figure S6A). The snRNA-seq showed stronger expression in neuronal cells, especially excitatory neurons, than non-neuronal cells (Figure S6B). These results collectively indicate that *SEMA6B* is expressed in excitatory neurons of various layers, including L5 of the cerebral cortex and possibly Purkinje cells, consistent with the phenotypes described above.

To determine whether the truncation of *SEMA6B* in the NMD(–) region affects neurological function *in vivo*, we created a zebrafish model to investigate the pathogenicity of the truncating human variants. The zebrafish genome contains two orthologs of human *SEMA6B*, *sema6ba* and *sema6bb*, which are both expressed in neuronal cells at 24 to 72 h post-fertilization (hpf), when neurons are migrating and neuronal connections are forming.<sup>21</sup> To introduce truncation of *sema6ba* and *sema6bb* by nonhomologous end joining (NHEJ)-based genome editing in each of the two paralogs, we employed the CRISPR-Cas9 system and analyzed the first generation of F0 crispants. We generated CRISPR RNAs (crRNAs) targeting the last coding exon of *sema6ba* (*sema6ba*-ex.17) or *sema6bb* (*sema6bb*-ex.17). We also generated crRNAs targeting the sequences encoding the first methionine in exon 2 of *sema6ba* (*sema6ba*-ex.2) or *sema6bb* (*sema6bb*-ex.2) to create loss-of-function mutations (Figure S7A, Table S6). T7 endonuclease I (T7E1) assays and subcloning of PCR products with a genomic DNA template derived from five mixed embryos showed >63% mosaicism (Figure S7B and S7D). We also confirmed the editing efficiency in single F0 crispants by heteroduplex mobility assay (Figure S7C). Sanger sequencing confirmed deletion at the ICD. The expression



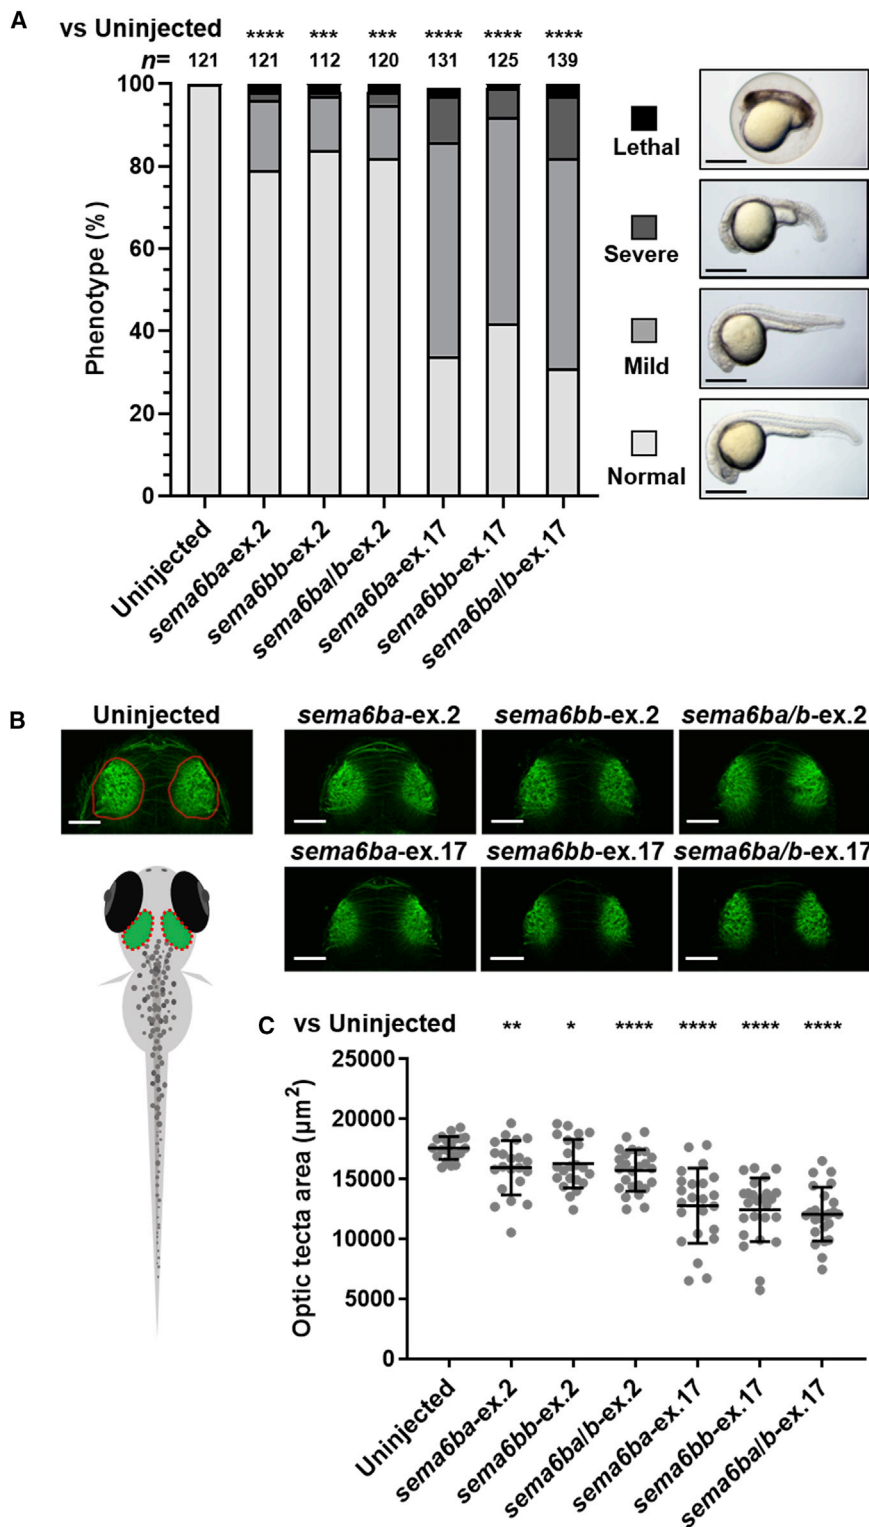

**Figure 2. Disruption of Zebrafish *sema6ba* and *sema6bb* 3' Regions Results in CNS Defects**

(A) Frequency of developmental defects and CNS abnormalities in embryos at 24 hpf. Zebrafish embryos were injected with the following crRNAs: *sema6ba-ex.2*, *sema6bb-ex.2*, *sema6ba/b-ex.2*, *sema6ba-ex.17*, *sema6bb-ex.17*, or *sema6ba/b-ex.17*, all of which were duplexed with tracrRNA and Cas9 protein. Uninjected embryos and F0 crispants were scored on the basis of morphological anomalies; lethal (cell death distributed over the entire body), severe (smaller head with shortened body axis), mild (developmental delay with smaller head), and normal. (n = 112–139 in each group). All experiments were performed three times. Scale bar, 500 µm. \*\*\*p < 0.0005, \*\*\*\*p < 0.0001 by the chi-square test.

(B) Acetylated tubulin staining of uninjected embryo and F0 crispants shows brain structures at 2.5 dpf (dorsal view). Schematic representation of neuroanatomical structures shows the area of the optic tectum (red dotted oval).

(C) F0 crispants with *sema6ba-ex.17*, *sema6bb-ex.17*, and *sema6ba/b-ex.17* displayed a smaller optic tectum than uninjected embryos or *sema6ba-ex.2*, *sema6bb-ex.2*, or *sema6ba/b-ex.2* F0 crispants. Scale bar, 100 µm. Data are represented as the mean ± SD. \*p < 0.05, \*\*p < 0.01, \*\*\*p < 0.0005, \*\*\*\*p < 0.0001 by Student's t test.

small head and short body (Figure 2A). Immunostaining of the central nervous system (CNS) with an anti-acetylated tubulin antibody (an axonal marker) and measurement of neuroanatomical structures showed a smaller optic tectum, the area between the eyes as a surrogate for brain size, in *sema6ba-ex.17*-, *sema6bb-ex.17*-, and *sema6ba/b-ex.17*-injected embryos compared with either control embryos or embryos injected with *sema6ba-ex.2*, *sema6bb-ex.2*, or *sema6ba/b-ex.2* (Figure 2B). Behavioral manifestations of pentylenetetrazole (PTZ)-induced electrographic seizures, including episodes of excessive locomotor activity and clonus-like behavior, are well characterized

in zebrafish models of epilepsy.<sup>22–24</sup> We tracked and quantified total swimming distance in response to PTZ exposure (Figures 3A and 3B). Uninjected control larvae and larvae injected with *sema6ba/b-ex.2* or *sema6ba/b-ex.17* 7 days post fertilization (dpf), in which most of the main neuronal clusters and axon tracts had been formed, were exposed to PTZ at concentrations of 2.5, 5, or 15 mM.

levels of *sema6ba* and *sema6bb* transcripts were relatively decreased in crispants injected with *sema6ba/b-ex.2* but not in those injected with *sema6ba/b-ex.17* (Figure S8). Compared with *sema6ba-ex.2*-, *sema6bb-ex.2*-, and *sema6ba/b-ex.2*-injected embryos, the *sema6ba-ex.17*-, *sema6bb-ex.17*-, and *sema6ba/b-ex.17*-injected embryos presented with more severe developmental defects, such as

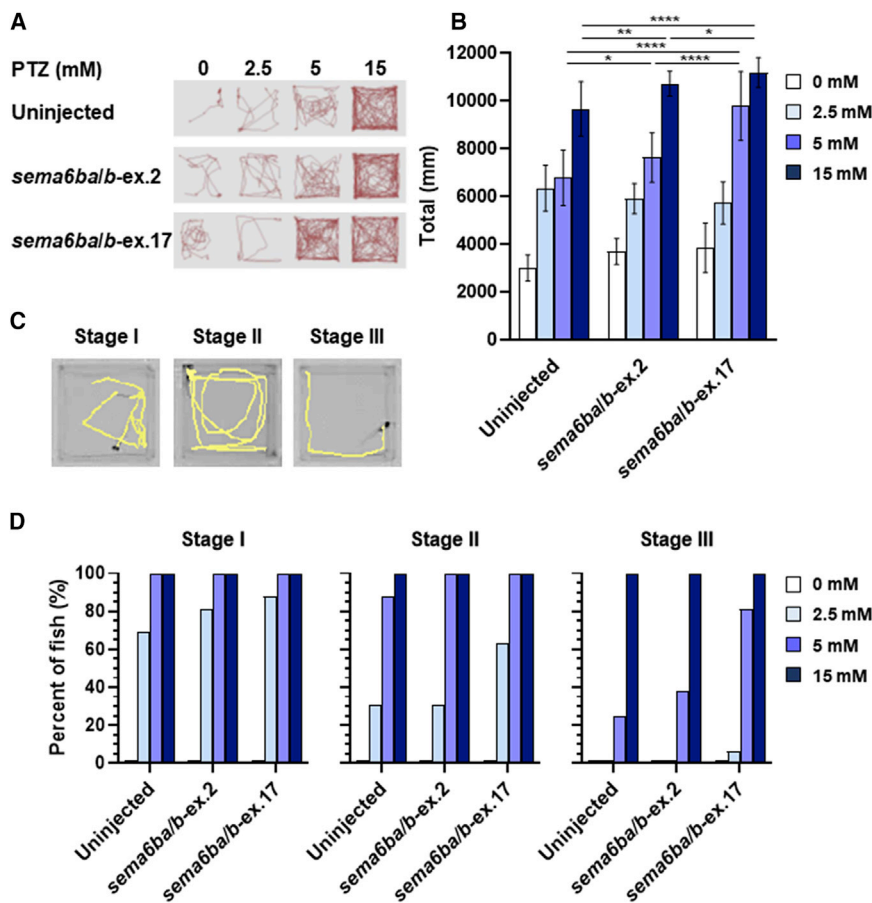

**Figure 3. Behavioral Response Following PTZ Exposure in *sema6ba* and *sema6bb* F0 Crisprants**

(A) Representative trajectory plots are shown, with the tracking from one 7 dpf larva per well, during exposure to PTZ for 3 min (PTZ concentrations of 0, 2.5, 5, and 15 mM).

(B) Quantification of the swimming distance of 7 dpf larvae during 15 min after treatment with different concentrations of PTZ. Data are represented as the mean  $\pm$  SD. \* $p < 0.05$ , \*\* $p < 0.01$ , \*\*\*\* $p < 0.0001$  by Student's *t* test.

(C) Sample locomotion tracking plots of individual 7 dpf larva. Plots are shown for typical seizure behaviors. A PTZ-induced seizure is characterized in three stages: stage I (increased swim activity), stage II (increased swim activity with circular motion), and stage III (convulsions).

(D) Percentages of 7 dpf larvae in different behavioral categories (stage I, stage II, stage III) with exposure to 2.5, 5, and 15 mM PTZ and observation for 15 min.

enrichment analysis for *SEMA6B* was  $2.8 \times 10^{-8}$  (expected number in 346 trios: 0.000237), whereas the *p* value for the whole coding region of *SEMA6B* was  $5.0 \times 10^{-6}$  (expected number in 346 trios: 0.00316) (exome-wide *p* value threshold:  $2.5 \times 10^{-6}$ ). The large difference

Seizure behavior was not observed in any larvae that were not treated with PTZ (Figures 3A and 3B, Video S1). Total swimming distance increased in a dose-dependent manner in controls and crisprants (Figures 3A and 3B, Video S1). It should be noted that incubation with 5 mM PTZ produced hyperactive responses in *sema6ba/b-ex.17*-injected larvae compared with *sema6ba/b-ex.2*-injected or uninjected larvae (Figures 3A and 3B, Video S1). PTZ exposure increases larvae swimming activity (stage I), causes rapid “whirlpool” motion circular swimming (stage II), and results in loss of posture and activity for 1 to 3 s in a clonus-like seizure (stage III) (Figure 3C).<sup>22</sup> Lower concentrations of PTZ (e.g., 2.5 mM) produced stage I and stage II behavior, but all larvae exhibited clonus-like convulsion (stage III) in the presence of high PTZ concentrations (15 mM) (Figure 3D, Video S1). Exposure to 2.5 mM PTZ produced stage II but not stage III behavior in 31% of uninjected or *sema6ba/b-ex.2*-injected larvae. However, 5 mM PTZ exposure produced stage III behavior in 25%, 38%, and 81% of uninjected, *sema6ba/b-ex.2*-injected, or *sema6ba/b-ex.17*-injected larvae, respectively. These results indicated that larvae with 3' truncations in *sema6ba* and *sema6bb* had increased sensitivity to PTZ and exhibited a stage III (clonus-like) behavior when exposed to 5 mM PTZ (Figure 3D).

In this study, we performed enrichment analysis for truncating DNVs in NMD(–) regions. The *p* value of the

was partly due to the low depth of the last two *SEMA6B* exons (Figure 1F). Thus, we demonstrated that enrichment analysis targeting specific regions can identify novel causative genes that are missed by conventional analysis of whole coding regions. This framework can be applied to other coding regions for other types of variants. For example, some coding regions are constrained for missense variants, and missense variants at such regions are likely to cause genetic diseases.<sup>9</sup> Enrichment analysis of missense DNVs specific to constrained coding regions theoretically has higher statistical power and could identify novel causative genes.

The theoretical mutation rates used in this and other studies have some limitation in accuracy for frameshift variants. To calculate the rates of frameshift DNVs per gene, the studies multiplied rates of nonsense variants per gene by the general ratio (1.25 or 1.07) of very rare (or *de novo*) frameshift to nonsense variants in all genes.<sup>2, 3, 5</sup> The calculation ignores different sequence context in different genes, and the way to calculate the sequence-context-aware rate of frameshift DNVs should be developed in the near future.

To investigate the effects of the truncated protein *in vivo*, we generated a zebrafish model with *sema6ba* and *sama6bb* CRISPR-Cas9-mediated mutations. The *sema6ba* and *sema6bb* ICD-truncated F0 crisprants showed developmental defects and CNS anomalies consistent with the

affected individuals' phenotypes. In contrast, F0 *sema6ba* and *sama6bb* loss-of-function crispants showed a very mild phenotype. ICD truncation, therefore, produces more significant CNS anomalies than the loss-of-function in a zebrafish model. To generate a seizure model, we exposed zebrafish larvae to PTZ, a gamma-aminobutyric acid (GABA) type A receptor channel blocker that blocks fast synaptic inhibition. Members of the class 4 semaphorin family are important regulators of both glutamatergic and GABAergic synapse development.<sup>25,26</sup> Furthermore, *Sema6A* contributes to GABAergic interneuron migration during brain development, and its disruption might be an underlying cause of autism spectrum disorder (ASD).<sup>27</sup> In addition, this pathophysiological mechanism might be shared with epilepsy.<sup>27,28</sup> Consistent with this hypothesis, *SEMA6B* was expressed in GABAergic neurons (Figure S6B), and disruption of *SEMA6B* function in GABAergic neurons might contribute to epilepsy in humans. Our zebrafish *sema6ba/b*-ex.17-injected crispants demonstrated increased PTZ-mediated hyperactive responses compared with the response of the *sema6ba/b*-ex.2-injected larvae. These results support the pathogenic effects of the *sema6ba* and *sema6bb* ICD-truncated proteins *in vivo*. The results are consistent with those in a chick model, in which a truncated version of the *SEMA6B* homolog lacking the ICD was unable to rescue a loss-of-function phenotype involving abnormal commissural axon guidance.<sup>29</sup> Our analysis using the first generation of F0 crispants can be effective, but its limitations must also be considered. Because F0 crispants are mosaic, to more closely resemble the pathological conditions of the NMD(–) variants in humans, we would need to establish F1 generations and perform the correct crosses of zebrafish. Although further work using *in vivo* or *in vitro* *SEMA6B* models is needed to elucidate the functional mechanism of ICD truncation in PME, these results indicate an important role for *SEMA6B* in the pathogenesis of neurological disorders.

What is the pathomechanism of truncating variants at NMD(–) regions of *SEMA6B*? Genes depleted for truncating variants at NMD(–) regions in general populations tended to encode proteins with domains for oligomerization (but did so statistically insignificantly) (Supplemental Materials and Methods, Table S7 and S8). Therefore, when such genes have truncating variants at NMD(–) regions in diseases, the truncated proteins might exert their pathogenicity via oligomerization. Similarly, class 6 semaphorin proteins (*Sema6*) form homodimers via their sema domain at the plasma membrane and interact with other transmembrane proteins in a juxtacrine manner.<sup>30</sup> The juxtacrine interaction leads to inward signaling (called reverse signaling) via interaction of the ICD of semaphorin proteins with other proteins.<sup>31,32</sup> Without its ICD, *Sema6A* did not exert the reverse signaling in mice, and ectopic expression of *Sema6B* without its ICD resulted in defective reverse signaling in a dominant-negative manner in chickens.<sup>29,32</sup> The reverse signaling of semaphorin proteins has versatile functions,

including targeting of axons and dendrites, synapse formation, and cell migration.<sup>33–36</sup> Thus, *SEMA6B* without ICD might impair such functions of reverse signaling.

In this study, we demonstrated (1) strong statistical enrichment of DNVs in the NMD(–) region of *SEMA6B* in DEE-affected individuals, (2) multiple individuals in general populations had heterozygous truncating variants in the NMD(+) region of *SEMA6B*, (3) the spatial expression pattern of *SEMA6B* among various neuron types was consistent with the individuals' phenotype, and (4) zebrafish models expressing variants with truncations in the NMD(–) region in *SEMA6B* orthologs showed neurological impairments, whereas (5) zebrafish models expressing variants in the NMD(+) region produced a very mild phenotype. From these results, we demonstrated that truncating DNVs in the NMD(–) region of *SEMA6B* cause PME.

### Supplemental Data

Supplemental Data can be found online at <https://doi.org/10.1016/j.ajhg.2020.02.011>.

### Acknowledgments

We thank all of the participants for their cooperation in this research. We also thank Ms. K. Takabe, Mr. T. Miyama, Ms. N. Watanabe, Ms. M. Sato, Mr. S. Nakamura, and Ms. S. Sugimoto at the Department of Human Genetics, Yokohama City University Graduate School of Medicine, for their technical assistance. We are also grateful to Edanz ([www.edanzediting.com](http://www.edanzediting.com)) for editing a draft of this manuscript. This work was supported by AMED under grant numbers JP19ek0109280, JP19dm0107090, JP19ek0109301, JP19ek0109348, and JP19kk020515 (N.M.); JSPS KAKENHI grant numbers JP17H01539 (N.M.), JP16H05160 (H.S.), JP16H05357 (N.M.), JP16H06254 (A.T.), JP15K10367 (M.N.), JP19H03621 (S.M.), JP17K15630 (T.M.), JP17H06994 (A.F.), and JP19K16921 (E.K.); and grants from the Ministry of Health, Labor and Welfare (N.M.), the Takeda Science Foundation (N.M., H.S., and N.M.), and The Ichiro Kanehara Foundation for the Promotion of Medical Science & Medical Care (S.M.).

### Declaration of Interests

The authors declare no competing interests.

Received: November 20, 2019

Accepted: February 19, 2020

Published: March 12, 2020

### Web Resources

Allen Brain Atlas, <https://portal.brain-map.org/>  
CRISPRdirect, <https://crispr.dbcls.jp/>  
dbSNP, <http://www.ncbi.nlm.nih.gov/projects/SNP/>  
DenovoFilter, <https://github.com/jeremymcrae/denovoFilter>  
Denovogear, <https://github.com/ultimatesource/denovogear>  
DNMfilter, <https://github.com/yongzhuang/DNMfilter>  
ExAC browser, <http://exac.broadinstitute.org/>  
Genome Analysis Toolkit, <https://software.broadinstitute.org/gatk/>



gnomAD, <https://gnomad.broadinstitute.org/>  
 InterPro, <https://www.ebi.ac.uk/interpro/>  
 NHLBI Exome Sequencing Project, <http://exac.broadinstitute.org>  
 Novoalign 3.00, <http://www.novocraft.com>  
 OMIM, <http://www.omim.org> Picard software, <http://broadinstitute.github.io/picard/>  
 Seurat, <https://satijalab.org/seurat/install.html>  
 snpEff, <http://snpeff.sourceforge.net/>  
 Triodenovo, <https://genome.sph.umich.edu/wiki/Triodenovo>

## References

- Coe, B.P., Stessman, H.A.F., Sulovari, A., Geisheker, M.R., Bakken, T.E., Lake, A.M., Dougherty, J.D., Lein, E.S., Hormozdiari, F., Bernier, R.A., and Eichler, E.E. (2019). Neurodevelopmental disease genes implicated by de novo mutation and copy number variation morbidity. *Nat. Genet.* *51*, 106–116.
- McRae, J., Clayton, S., Fitzgerald, T., Kaplanis, J., Prigmore, E., Rajan, D., Sifrim, A., Aitken, S., Akawi, N., Alvi, M., et al.; Deciphering Developmental Disorders Study (2017). Prevalence and architecture of de novo mutations in developmental disorders. *Nature* *542*, 433–438.
- Samocha, K.E., Robinson, E.B., Sanders, S.J., Stevens, C., Sabo, A., McGrath, L.M., Kosmicki, J.A., Rehnström, K., Mallick, S., Kirby, A., et al. (2014). A framework for the interpretation of de novo mutation in human disease. *Nat. Genet.* *46*, 944–950.
- Lord, J., Gallone, G., Short, P.J., McRae, J.F., Ironfield, H., Wynn, E.H., Gerety, S.S., He, L., Kerr, B., Johnson, D.S., et al.; Deciphering Developmental Disorders study (2019). Pathogenicity and selective constraint on variation near splice sites. *Genome Res.* *29*, 159–170.
- Fitzgerald, T., Gerety, S., Jones, W., van Kogelenberg, M., King, D., McRae, J., Morley, K., Parthiban, V., Al-Turki, S., Ambridge, K., et al.; Deciphering Developmental Disorders Study (2015). Large-scale discovery of novel genetic causes of developmental disorders. *Nature* *519*, 223–228.
- Short, P.J., McRae, J.F., Gallone, G., Sifrim, A., Won, H., Geschwind, D.H., Wright, C.F., Firth, H.V., FitzPatrick, D.R., Barrett, J.C., and Hurles, M.E. (2018). De novo mutations in regulatory elements in neurodevelopmental disorders. *Nature* *555*, 611–616.
- Jansen, S., Geuer, S., Pfundt, R., Brough, R., Ghongane, P., Herkert, J.C., Marco, E.J., Willemsen, M.H., Kleefstra, T., Hannibal, M., et al.; Deciphering Developmental Disorders Study (2017). De Novo Truncating Mutations in the Last and Penultimate Exons of PPM1D Cause an Intellectual Disability Syndrome. *Am. J. Hum. Genet.* *100*, 650–658.
- White, J., Mazzeu, J.F., Hoischen, A., Jhangiani, S.N., Gambin, T., Alcino, M.C., Penney, S., Saraiva, J.M., Hove, H., Skovby, E., et al.; Baylor-Hopkins Center for Mendelian Genomics (2015). DVL1 frameshift mutations clustering in the penultimate exon cause autosomal-dominant Robinow syndrome. *Am. J. Hum. Genet.* *96*, 612–622.
- Havrilla, J.M., Pedersen, B.S., Layer, R.M., and Quinlan, A.R. (2019). A map of constrained coding regions in the human genome. *Nat. Genet.* *51*, 88–95.
- Lek, M., Karczewski, K.J., Minikel, E.V., Samocha, K.E., Banks, E., Fennell, T., O'Donnell-Luria, A.H., Ware, J.S., Hill, A.J., Cummings, B.B., et al.; Exome Aggregation Consortium (2016). Analysis of protein-coding genetic variation in 60,706 humans. *Nature* *536*, 285–291.
- Hamanaka, K., Miyatake, S., Zerem, A., Lev, D., Blumkin, L., Yokochi, K., Fujita, A., Imagawa, E., Iwama, K., Nakashima, M., et al. (2018). Expanding the phenotype of IBA57 mutations: related leukodystrophy can remain asymptomatic. *J. Hum. Genet.* *63*, 1223–1229.
- El Kousseifi, C., Cornet, M.C., and Cilio, M.R. (2019). Neonatal Developmental and Epileptic Encephalopathies. *Semin. Pediatr. Neurol.* *32*, 100770.
- Hunter, S., Apweiler, R., Attwood, T.K., Bairoch, A., Bateman, A., Binns, D., Bork, P., Das, U., Daugherty, L., Duquenne, L., et al. (2009). InterPro: the integrative protein signature database. *Nucleic Acids Res.* *37*, D211–D215.
- Kälviäinen, R. (2015). Progressive Myoclonus Epilepsies. *Semin. Neurol.* *35*, 293–299.
- Shibasaki, H., Yamashita, Y., Neshige, R., Tobimatsu, S., and Fukui, R. (1985). Pathogenesis of giant somatosensory evoked potentials in progressive myoclonic epilepsy. *Brain* *108*, 225–240.
- Hitomi, T., Ikeda, A., Kondo, T., Imamura, H., Inouchi, M., Matsumoto, R., Terada, K., Kanda, M., Matsushashi, M., Nagamine, T., et al. (2011). Increased cortical hyperexcitability and exaggerated myoclonus with aging in benign adult familial myoclonus epilepsy. *Mov. Disord.* *26*, 1509–1514.
- Hoxha, E., Balbo, I., Miniaci, M.C., and Tempia, F. (2018). Purkinje Cell Signaling Deficits in Animal Models of Ataxia. *Front. Synaptic Neurosci.* *10*, 6.
- Lein, E.S., Hawrylycz, M.J., Ao, N., Ayres, M., Bensinger, A., Bernard, A., Boe, A.F., Boguski, M.S., Brockway, K.S., Byrnes, E.J., et al. (2007). Genome-wide atlas of gene expression in the adult mouse brain. *Nature* *445*, 168–176.
- Rosenberg, A.B., Roco, C.M., Muscat, R.A., Kuchina, A., Sample, P., Yao, Z., Graybuck, L.T., Peeler, D.J., Mukherjee, S., Chen, W., et al. (2018). Single-cell profiling of the developing mouse brain and spinal cord with split-pool barcoding. *Science* *360*, 176–182.
- Zeisel, A., Hochgerner, H., Lönnerberg, P., Johnsson, A., Memic, F., van der Zwan, J., Häring, M., Braun, E., Borm, L.E., La Manno, G., et al. (2018). Molecular Architecture of the Mouse Nervous System. *Cell* *174*, 999–1014.e22.
- Ebert, A.M., Lamont, R.E., Childs, S.J., and McFarlane, S. (2012). Neuronal expression of class 6 semaphorins in zebrafish. *Gene Expr. Patterns* *12*, 117–122.
- Baraban, S.C., Taylor, M.R., Castro, P.A., and Baier, H. (2005). Pentylentetrazole induced changes in zebrafish behavior, neural activity and c-fos expression. *Neuroscience* *131*, 759–768.
- Afrikanova, T., Serruys, A.S., Buenafe, O.E., Clinckers, R., Smolders, I., de Witte, P.A., Crawford, A.D., and Esguerra, C.V. (2013). Validation of the zebrafish pentylentetrazol seizure model: locomotor versus electrographic responses to antiepileptic drugs. *PLoS ONE* *8*, e54166.
- Wang, K., Chen, X., Liu, J., Zou, L.P., Feng, W., Cai, L., Wu, X., and Chen, S.Y. (2018). Embryonic exposure to ethanol increases the susceptibility of larval zebrafish to chemically induced seizures. *Sci. Rep.* *8*, 1845.
- Pasterkamp, R.J., and Giger, R.J. (2009). Semaphorin function in neural plasticity and disease. *Curr. Opin. Neurobiol.* *19*, 263–274.
- Paradis, S., Harrar, D.B., Lin, Y., Koon, A.C., Hauser, J.L., Griffith, E.C., Zhu, L., Brass, L.F., Chen, C., and Greenberg, M.E. (2007). An RNAi-based approach identifies molecules required

- for glutamatergic and GABAergic synapse development. *Neuron* 53, 217–232.
27. Karlie Menzel, G.S. Yuchio Yanagawa, Turhan Cocksaygan, Céline Plachez. (2019). GABAergic cell loss in mice lacking autism-associated gene *Sema6A*. *bioRxiv*. 10.1101/663419.
  28. Håkansson, K., Runker, A.E., O’Sullivan, G.J., Mitchell, K.J., Waddington, J.L., and O’Tuathaigh, C.M. (2017). Semaphorin 6A knockout mice display abnormalities across ethologically-based topographies of exploration and in motor learning. *Neurosci. Lett.* 641, 70–76.
  29. Andermatt, I., Wilson, N.H., Bergmann, T., Mauti, O., Gessmann, M., Sockanathan, S., and Stoeckli, E.T. (2014). Semaphorin 6B acts as a receptor in post-crossing commissural axon guidance. *Development* 141, 3709–3720.
  30. Jones, E.Y. (2015). Understanding cell signalling systems: paving the way for new therapies. *Philos Trans A Math Phys Eng Sci* 373, 20130155.
  31. Battistini, C., and Tamagnone, L. (2016). Transmembrane semaphorins, forward and reverse signaling: have a look both ways. *Cell. Mol. Life Sci.* 73, 1609–1622.
  32. Perez-Branguli, F., Zagar, Y., Shanley, D.K., Graef, I.A., Chédotal, A., and Mitchell, K.J. (2016). Reverse Signaling by Semaphorin-6A Regulates Cellular Aggregation and Neuronal Morphology. *PLoS ONE* 11, e0158686.
  33. Godenschwege, T.A., Hu, H., Shan-Crofts, X., Goodman, C.S., and Murphey, R.K. (2002). Bi-directional signaling by Semaphorin 1a during central synapse formation in *Drosophila*. *Nat. Neurosci.* 5, 1294–1301.
  34. Jeong, S., Juhaszova, K., and Kolodkin, A.L. (2012). The Control of semaphorin-1a-mediated reverse signaling by opposing pebble and RhoGAPp190 functions in *drosophila*. *Neuron* 76, 721–734.
  35. Komiyama, T., Sweeney, L.B., Schuldiner, O., Garcia, K.C., and Luo, L. (2007). Graded expression of semaphorin-1a cell-autonomously directs dendritic targeting of olfactory projection neurons. *Cell* 128, 399–410.
  36. Toyofuku, T., Zhang, H., Kumanogoh, A., Takegahara, N., Yabuki, M., Harada, K., Hori, M., and Kikutani, H. (2004). Guidance of myocardial patterning in cardiac development by *Sema6D* reverse signalling. *Nat. Cell Biol.* 6, 1204–1211.

**Supplemental Data**

***De Novo* Truncating Variants in the Last Exon  
of *SEMA6B* Cause Progressive Myoclonic Epilepsy**

**Kohei Hamanaka, Eri Imagawa, Eriko Koshimizu, Satoko Miyatake, Jun Tohyama, Takanori Yamagata, Akihiko Miyauchi, Nina Ekhilevitch, Fumio Nakamura, Takeshi Kawashima, Yoshio Goshima, Ahmad Rithauddin Mohamed, Gaik-Siew Ch'ng, Atsushi Fujita, Yoshiteru Azuma, Ken Yasuda, Shintaro Imamura, Mitsuko Nakashima, Hiroto Saito, Satomi Mitsuhashi, Takeshi Mizuguchi, Atsushi Takata, Noriko Miyake, and Naomichi Matsumoto**

## **Case Reports**

### **Individual 1**

Individual 1 (II-1 in family 1, Figure 1E) is a 22-year-old Japanese male born to non-consanguineous parents. He has a healthy younger sister. He was born after 40 weeks of gestation via cesarean section due to breech presentation. His birth weight, length and head circumference were 3,676 g (+1.6 SD), 52.8 cm (+1.8 SD) and 38.0 cm (+3.6 SD), respectively. His developmental milestones were mildly delayed: head control at the age of 6 months, rolling over at 12 months, walking without support at 17 months and speaking meaningful words at 24–36 months. At 6 years, he developed generalized tonic-clonic seizures (GTCS) without fever, which responded to valproic acid and clonazepam. At this time, his interictal electroencephalogram (EEG) displayed abnormal discharges on the right hemisphere. At 9 years of age, he experienced seizures with forward head nodding and absence seizures 2–3 times a day and he visited our hospital for the first time. At the first visit, his EEG showed bursts of diffuse irregular spikes and waves, which corresponded to atypical absence seizures. At the age of 11 years, he developed daily repetitive atonic seizures thought to be negative myoclonus. At the same time, he received pulse steroid therapy and administration of prednisolone and piracetam, which were partially effective for seizures. At 13 years, he became unable to walk because of progressive motor regression. At 14 years, Parkinson's disease-like symptoms occurred with shaking hands, intention tremor, myoclonus, spasticity and muscle rigidity in the lower limbs. L-DOPA was given for these symptoms but was discontinued because of aggravation of muscle rigidity in the lower limbs. The deep tendon reflex in the lower limbs was increased and that in the upper limbs was mildly increased. He showed rather increased passive muscle tone and mild rigospasticity in all limbs, but the muscle weakness and extensibility were apparently normal. Some reflexes were abnormal at the age of 14 years: Babinski sign; negative, Chaddock sign; negative, Rossolimo sign; positive, Mendel-Bechterew sign; positive, Clonus; negative, and Wartenberg sign;



negative. At the age of 14 years, his height was 155.0 cm (-0.2 SD) and weight was 58.0 kg (+0.4 SD). Brain magnetic resonance imaging (MRI) was normal at this age. At 14 years, his EEG revealed diffuse spikes and slow waves especially in frontal, central and parietal regions. Somatosensory evoked potential (SEP) findings at 14 years had prolonged N20 latency and high amplitude of P24-N33 compared with those of individuals of the same age. Visual evoked potentials and auditory brain-stem response tests were normal. Severe intellectual disability was recognized, with his intelligence quotient (IQ) at 17 years being 25 based on the Tanaka-Binet test (the standardized Japanese version of the Stanford-Binet test). He showed significant dysarthria regression and was able to say his name but was not able to say his age or school name. He suffered from muscle pain in the lower limbs since the age of 20 years. Currently, 22 years old, his height is 174.0 cm (+0.6 SD), his weight is 67.0 kg (+0.4 SD) and his OFC is 59.5 cm (+4.7 SD). He cannot crawl or walk without support but can roll over and walk with assistance. He is able to communicate with others in a few words. Myoclonus in upper and lower limbs appeared when he feels uncomfortable. His myoclonus of the limbs often transits to GTCS. The seizures and involuntary movements are intractable and do not responded to clonazepam, valproic acid, carbamazepine, primidone, levetiracetam, piracetam, arotinolol, steroid or L-DOPA. Other laboratory examinations (complete blood count, serum chemistry, blood gases, ammonia, amino acid profiles and urine organic acids), echocardiography and abdominal ultrasonography were all normal. G-band and sub-telomere FISH analyses were also normal. His father and younger sister are completely healthy, but his mother has rheumatoid arthritis.

## **Individual 2**

Individual 2 (II-1 in family 2, Figure 1E) is a 28-year-old female born after 38 gestational weeks as the first child to non-consanguineous Japanese parents. She has a healthy younger sister. Her birth weight was 3,094 g (+0.7 SD) and her length was 49.0

cm (+0.1 SD). Her Apgar score at 5 minutes was 9. Her developmental milestones were apparently normal, with head control at the age of 4 months, rolling over at 5 months, sitting alone at 8 months, speaking meaningful words at 1 year and walking without support at 2 years and 4 months. At 11 months, she had her first episode of generalized tonic-clonic seizures (GTCS) with fever. The same febrile GTCS occurred at 1 year and 5 months, and phenobarbital treatment was started at this time. Then she experienced non-febrile GTCS three times (at 2 years, 2 years and 9 months, and 3 years and 9 months). She received phenytoin at 2 years and 9 months, which was ineffective at treating the seizures. At 3 years and 4 months, her interictal EEG showed diffuse slow waves of high amplitude at 2~3 Hz and with spike-and-wave complexes in the bilateral frontal region. At 5 years, she showed a loss of consciousness with abnormal eye movement more than 10 times a day, which responded to valproic acid and ethosuximide. The loss of consciousness occurred recurrently at 7 years. EEG at 8 years and 3 months showed diffuse slow waves of high amplitude at 2~3 Hz and fast waves in bilateral brain regions during sleep. At 9 years and 1 month, she had diffuse theta waves at 4~5 Hz and spike-and-wave bursts at 2~3 Hz in awake EEG. At 10 years, she developed atonic seizures and complex partial seizures, such as suddenly stopping movement and body rigidity. Since this time she has had difficulty walking with falling. Frequent myoclonus in upper and lower limbs and intention tremor were observed, especially when she was awakening, moving and feeling nervous. Clonazepam and L-DOPA were given, and the symptoms were partly recovered. At 12 years, she was referred to our hospital, with suspected progressive myoclonus epilepsy. Her deep tendon reflex in both upper and lower limbs increased. She also had motor regression and spasticity in lower limbs. Her intelligence was severely impaired (IQ=25 at 12 years, based on the Tanaka-Binet test), although no intellectual regression was observed. Interictal EEG at 12 years showed an abnormal pattern with multifocal spikes in the left parietal region and bilateral frontal regions. Auditory brainstem response, skin biopsy and funduscopy tests were all normal. Her SEP

test showed giant spikes. At 13 years, she started to use a wheelchair because of difficulty walking. At 13 years and 11 months, her sleep EEG showed multispikes in the left occipital region. At 16 years, she was suspected to have systemic lupus erythematosus (SLE) with butterfly patch, loss of hair, photodermatitis and oral ulcers. Her serum tests at this time detected positive anti-nuclear and anti-double stranded DNA antibodies. The SLE was thought to be drug-induced lupus erythematosus, because discontinuation of ethosuximide was followed by a disappearance of symptoms. At 17 years, she showed non-febrile GTCS, which has never recurred. The frequency of myoclonus occurrence has gradually increased in recent years. The MRI findings at 23 years were normal except for mild cerebellar atrophy. At 23 years and 9 months, her resting awake EEG showed slow waves at baseline, but no apparent spikes. Currently, at 28 years old, her height, weight and head circumference are 144.5 cm (-2.6 SD), 57.0 kg (+0.5SD) and 52.5 cm (-2.0 SD), respectively. She can speak two-word sentences with unclear pronunciation and understand simple conversation. She is able to control her wheelchair alone and walk holding onto something. Mild hypotonia was present, although without muscle weakness. Other laboratory examinations, including complete blood count, serum chemistry, echocardiography and abdominal ultrasonography were normal. Her mother and younger sister are completely healthy, but her father has asthma.

### **Individual 3**

Individual 3 (II-4 in family 3, Figure 1E) is a 14-year-old boy born after 40 weeks of gestation to non-consanguineous Israeli parents. He has four healthy brothers and five healthy sisters and his mother had a spontaneous abortion. His birth weight was 3,300 g (+1.5 SD). At birth, he had cardiac problems with bicuspid aortic valve and tricuspid regurgitation. No characteristic facial features were noticed. He showed almost normal developmental milestones, with head control at the age of 3 months, speaking meaningful words at 1 year, and walking without support at 2 years. At 1 year, he showed abnormal

background activity in awake EEG. At 2 years, he developed absence seizure which then occurred every day. At the same age he experienced two episodes of loss of consciousness, and two episodes of tongue biting. Brain MRIs at 2 years revealed a small vermis. At 4 years, he started clonazepam and lamotrigine to control seizures, which was effective. No clinical seizures were seen from 5 years of age. He had regression of motor and verbal skills, with no speech from 2 years of age and was unable to walk without support at 13 years of age. He showed severe intellectual disability, although he received no IQ or DQ tests. At 13 years, he had apparent cerebellar dysfunction with resting and intention tremor and ataxia, unstable gait and shaking and falling limbs. At 13 years, his EEG showed slow abnormal sleep features with paucity of sleep spindles. Currently, at 14 years, his head circumference is 52.0 cm (-2.5 SD). He cannot walk and is wheelchair-dependent. He is unable to communicate verbally. His chromosomal analysis was normal. His parents and all his siblings are completely healthy.

#### **Individual 4**

Individual 4 is an 11-year-old girl with global developmental delay and drop attacks. She had global developmental delay prior to two years old, but subsequently caught up on her milestones. At 4 years, she started having multiple and frequent episodes of drop attacks, and subsequently she regressed. She developed aphasia, had difficulty in chewing, and was unable to ambulate well. Her drop attacks were improved with clobazem and sulthiame, and she gradually developed her milestones. At 11 years, she developed unbalanced gait with ataxia, intention tremor, and urinary incontinence. In the last examinations at 11 years old, weight and head circumference were 40.9 kg (25–50<sup>th</sup> percentile) and 49.5 cm (2<sup>nd</sup> percentile), respectively. EEG showed epileptic discharges and focal bifrontal epileptiform discharges at 4 years, frequent frontocentral discharges during the awake state at 5 years, frequent intermittent slow spikes in the right posterior



region and abnormal background at 11 years and multiple episodes of drop attacks with corresponding spikes and polyspike slow discharges during sleep at 11 years.

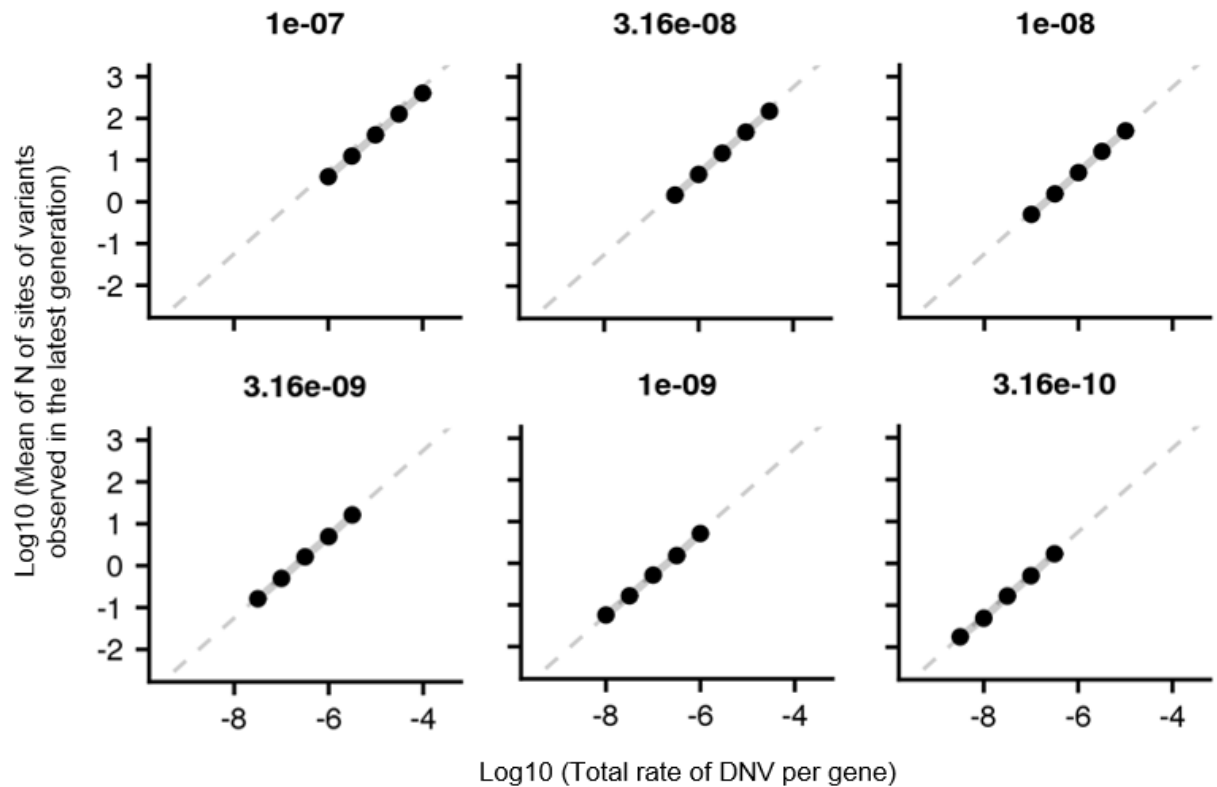

**Figure S1. Correlation of per-gene DNV rate and per-gene number of variants.**

Correlations between per-gene DNV rate and mean per-gene number of variants observed in 33,370 individuals in the last generation after mutation and selection events through 1,000,000 generations in genetic drift simulations. Variable parameters were analyzed: per-gene number of possible variant sites=10, 32, 100, 320, or 1000 (each dot from the left to the right in the figure); per-site DNV rate=3.16e-10, 1.0e-9, 3.16e-9, 1.0e-8, 3.2e-8, or 1.0e-7 (shown above). Selection coefficient and dominance coefficient were set as 0 where variants were under no natural selection. We calculated the mean of the per-gene number of observed variants across at least 300 simulations of each parameter setting. Note that the per-gene DNV rate and mean per-gene number of variants were on the same line and correlated regardless of variable parameter settings. Dashed line indicates an arbitrary reference line common in the three panels.

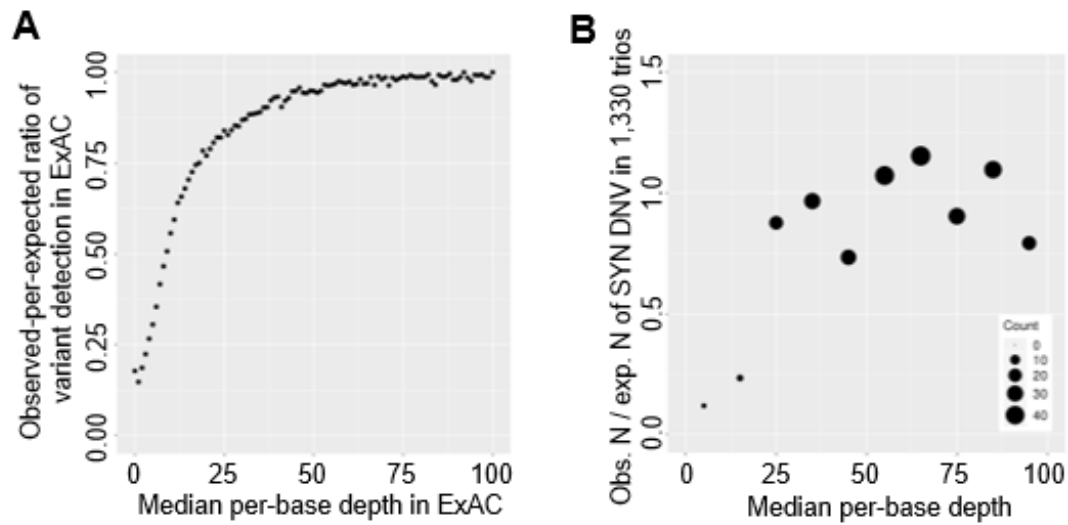

**Figure S2. Sequencing depth affects variant detection.**

(A) Correlation between median per-base depth and observed-per-expected ratio of variant detection in ExAC. The ratio was calculated as a ratio of the observed number of synonymous variants to the expected rate of synonymous DNVs at sites of each depth and normalized to the ratio at sites with depth >100. The bin of median per-base depth in ExAC at the X axis: 2. (B) Correlation between median per-base depth and observed-per-expected ratio of DNV detection in 1,330 trios. The ratio was calculated as a ratio of the observed number of synonymous DNVs to the expected rate of synonymous DNVs at sites of each depth and normalized to the ratio at sites with depth >100. Median per-base depth was calculated separately for each capture kit. The size of dots is correlated with the observed number of synonymous DNVs at each bin of depth as shown at lower right. The bin of median per-base depth at the X axis: 10.

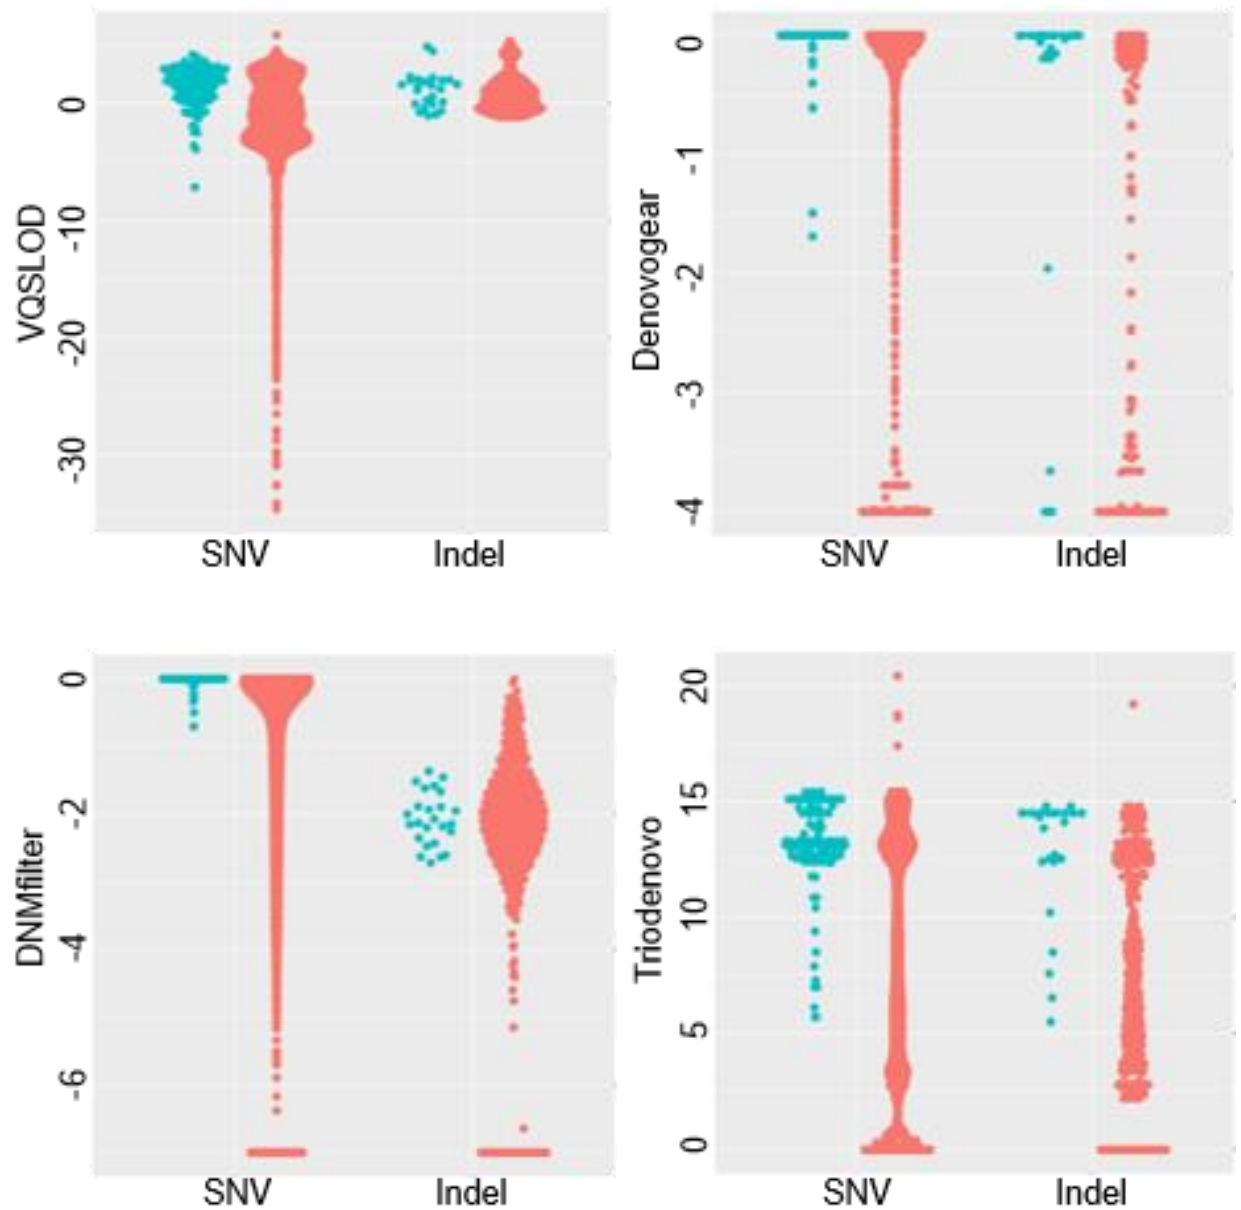

**Figure S3. Optimization of thresholds for DNV detection.**

Bee swarm plots of DNV quality scores from four systems. Candidate DNV calls from 4,592 SNVs and 502 indels, including 115 SNV and 25 indel TP (true positive) DNVs were analyzed. Green and red dots indicate TP DNVs and the other variants, respectively. We set thresholds for each score so that no TP DNV was missed.



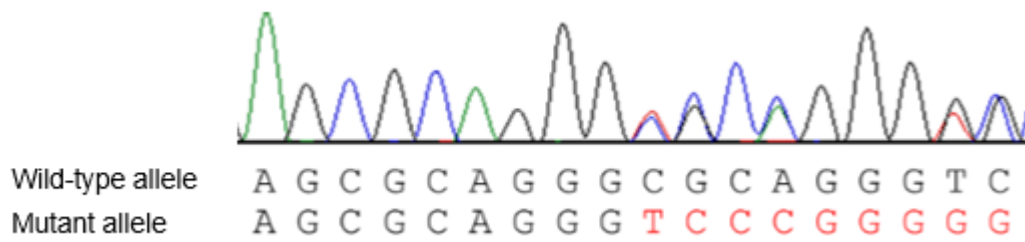

**Figure S4. *SEMA6B* transcript with a truncating DNV in the last exon was not subject to NMD.**

A representative Sanger sequencing electropherogram of an *SEMA6B* transcript RT-PCR amplicon from a lymphoblastoid cell line from Individual 2. Sequence differences between wild-type and mutant alleles are shown in red.

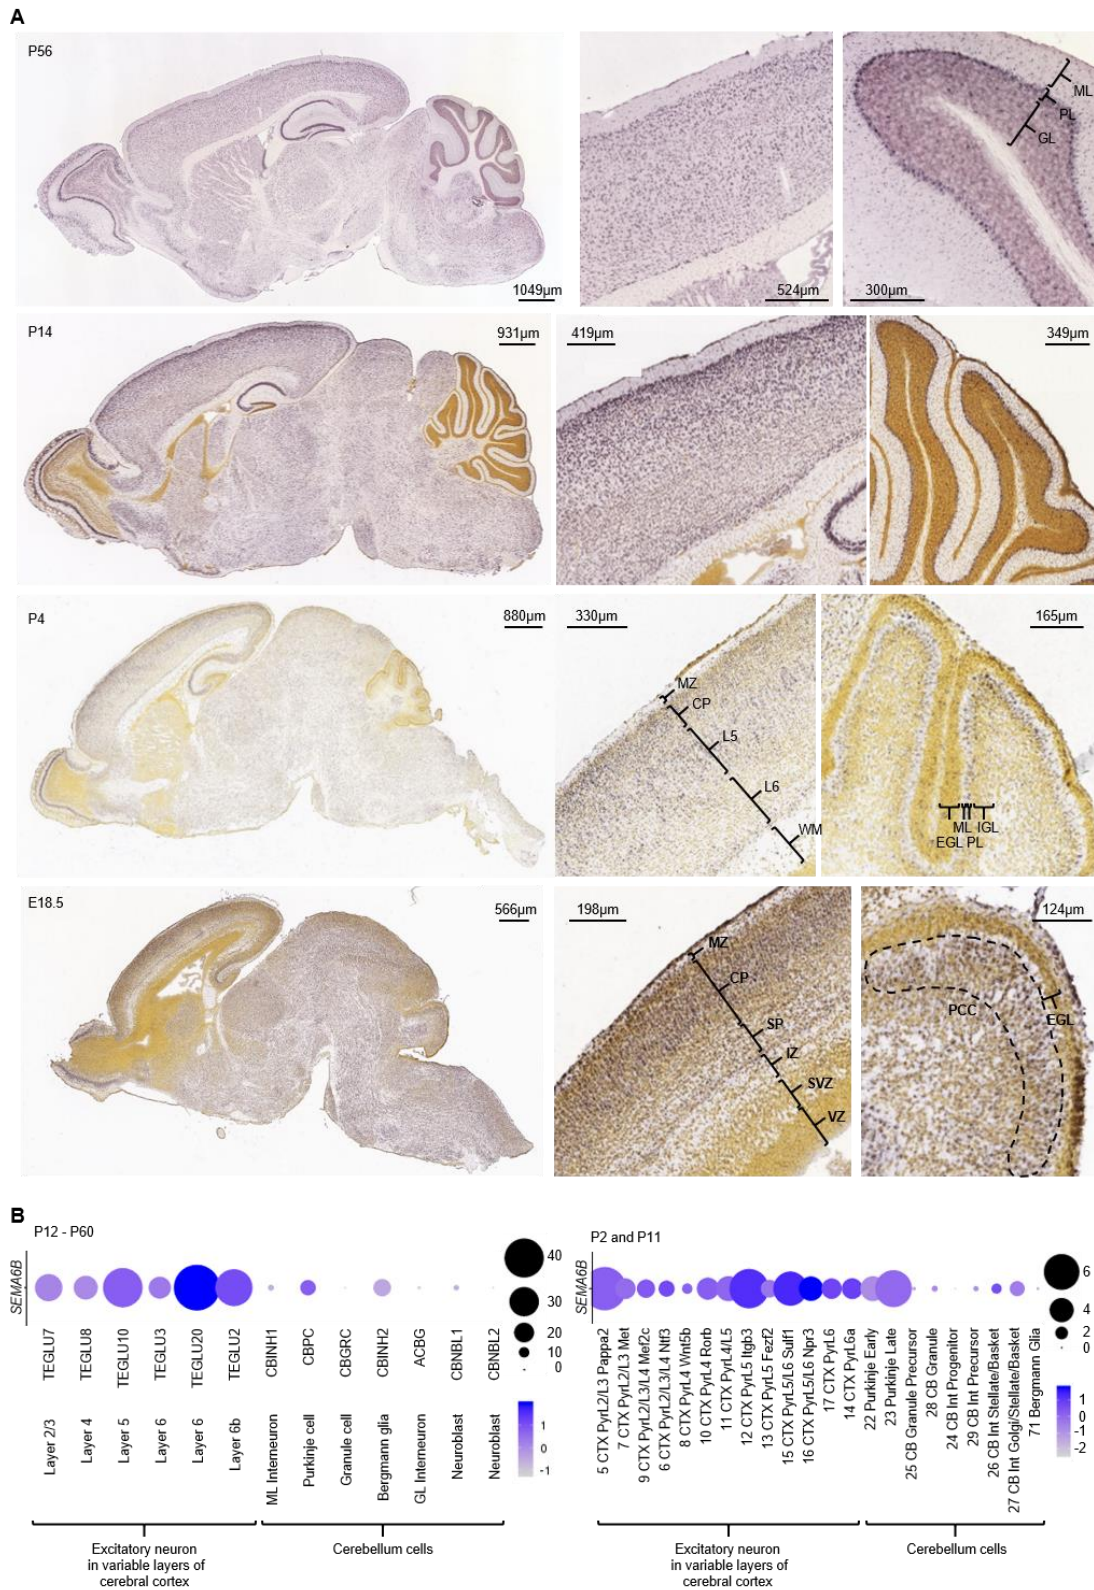

**Figure S5. Expression pattern of *Sema6b* in mouse brain.**

(A) ISH of *Sema6b* in P56 (top), P14 (second from top), P4 (third from top), and E18.5 (bottom) mouse brain from the Allen Brain Atlas. Overall view (left) and a magnified view of the cortex (middle) and cerebellum (left) are shown. Note that the outer part of the PCC (circled with a dotted black circle) was stained. MZ: marginal zone; CP: cortical plate; L5: layer 5; L6: layer 6; SP: subplate; IZ: intermediate zone; SVZ: subventricular zone; VZ: ventricular zone; WM: white matter; EGL: external germinal layer; ML: molecular layer; PL: Purkinje cell layer; IGL: internal granular layer; GL: granular layer; PCC: Purkinje cell cluster. (B) *Sema6b* expression by scRNA-seq of P12-P60 mouse brain<sup>12</sup> (left) and P2 and P11 mouse brain<sup>13</sup> (right). Each dot represents each cell cluster identified by the scRNA-seq analysis. The size and color of dots represent the percentage of cells expressing *Sema6b*, and the mean scaled expression level (see supplemental methods) in each cell cluster is shown in the right. Below each dot, the original name is described of each cell cluster in the publications of the datasets with a brief comment.<sup>12,13</sup> More detailed descriptions of each cluster are available (Table S4 and S5).





(A) Heatmap of *SEMA6B* expression in bulk RNA-seq of variable regions of human brain at variable stages of development. The developmental stages and brain regions of samples are shown as horizontal and vertical axes, respectively. Red color in each box indicates strength (RPKM: reads per kilobase per million) of *SEMA6B* expression in samples of each developmental stage and brain region as shown in the right color bar while blue color in several boxes indicates no sample was available in the developmental stage and brain region. Pcw: post-conceptual weeks; mos: months; yrs: years. (B) Dotplot of *SEMA6B* expression in single-nucleus RNA-seq (snRNA-seq) of variable cell types of adult human brain. The size and color of dots represent the percentage of cells expressing *SEMA6B* and the mean of expression (CPM: count per million) in cell clusters identified by snRNA-seq. Below each dot, the original name of the cell cluster describing a cell type, layers where the cell cluster localized, and marker genes. Exc: glutamatergic neuron; Inh: GABAergic neuron; Astro: astrocyte; endo: endothelial cell; micro: microglia; oligo: oligodendrocyte; OPC: oligodendrocyte precursor cells; peri: pericyte; VLMC: vascular and leptomeningeal cell.

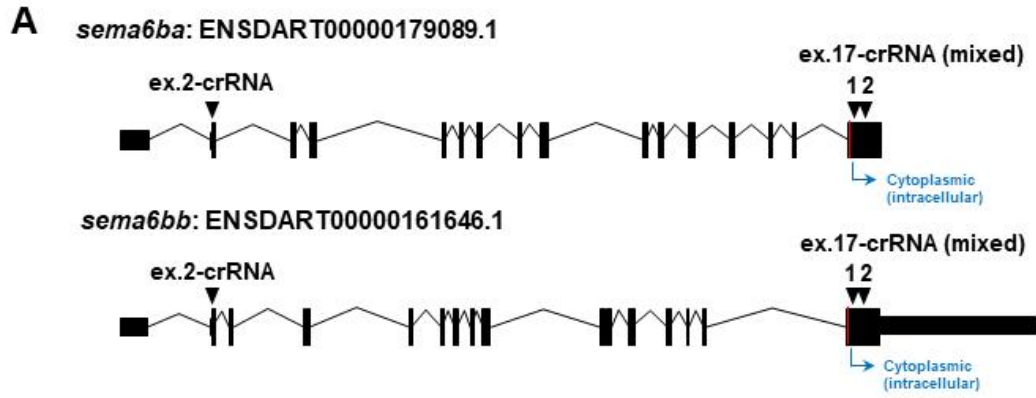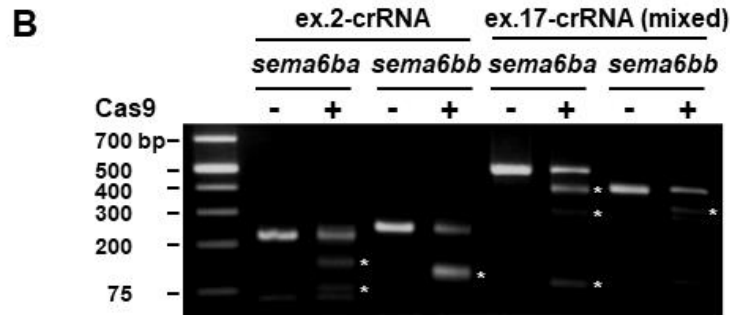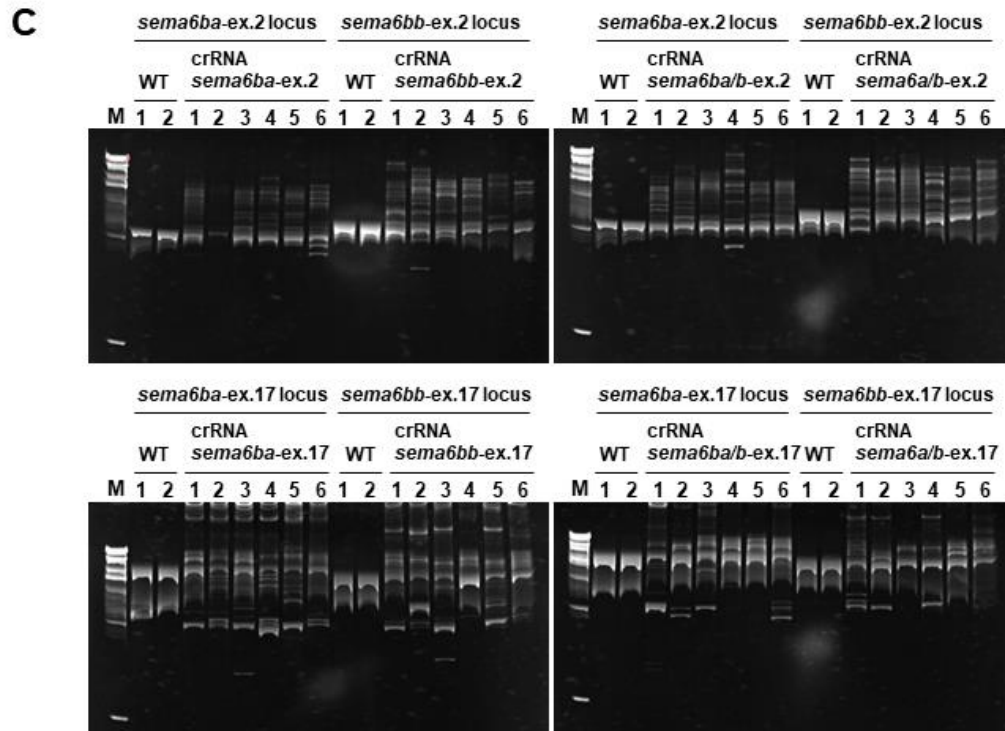

**D** *sema6ba*

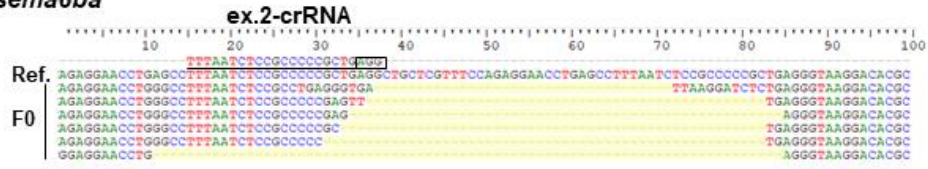

*sema6bb*

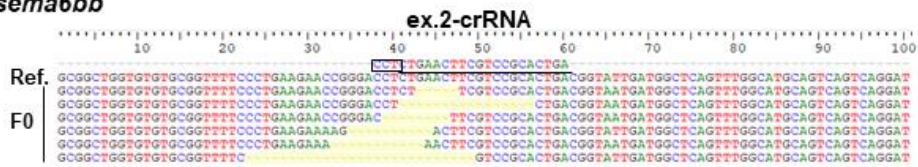

*sema6ba* (ICD)

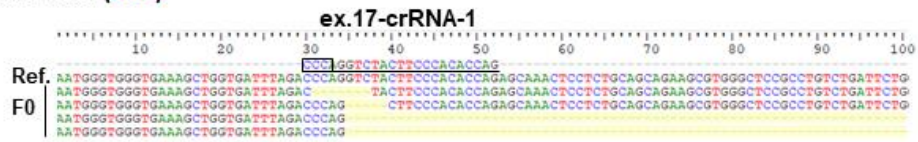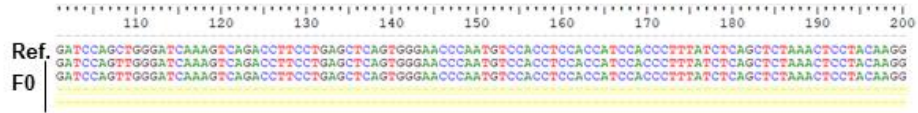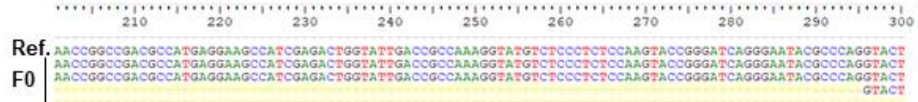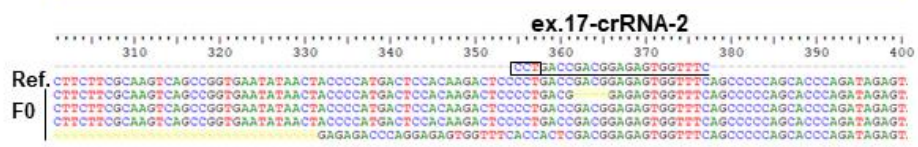

*sema6bb* (ICD)

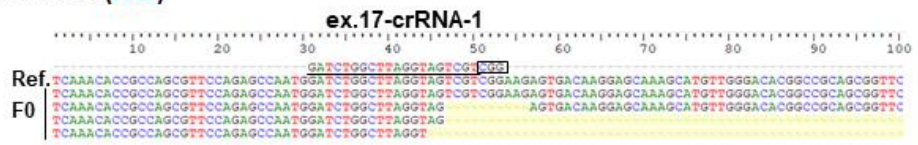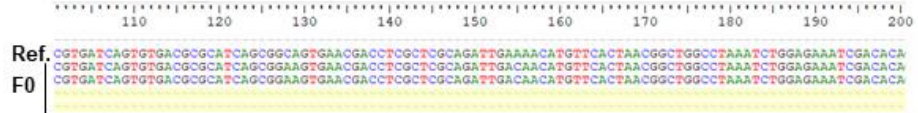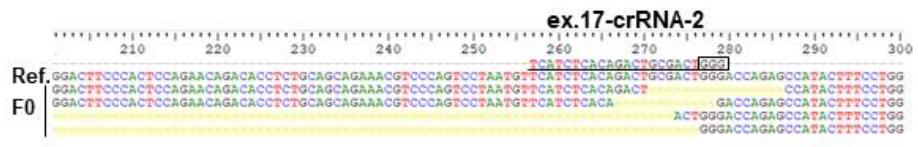

**Figure S7. CRISPR/Cas9-induced genome editing efficiencies of zebrafish *sema6ba* and *sema6bb* evaluated in F0 crispants.**

(A) Schematic of crRNA targeted exons of zebrafish *sema6ba* and *sema6bb*. Target sites are indicated by arrowheads on exons 2 and 17. Black boxes: exons, red boxes: transmembrane region. blue arrow: starting point of the cytoplasmic region. (B) Evaluation of CRISPR/Cas9-mediated cleavage using the T7E1 assay. The equivalent of five embryos were loaded per each lane. Asterisks indicate the expected positions of cleaved products by the mismatch-sensitive T7E1 enzyme. (C) Heteroduplex mobility assay in the larvae injected with CRISPR/Cas9 at 5 dpf. The *sema6ba*- and *sema6bb*-targeted genomic regions were amplified using the genomic DNA from each individual embryo by PCR with locus-specific primers. Heteroduplex bands and multiple short bands are shown in CRISPR/Cas9 injected embryos (WT: n=2, crispants: n=6). Products from each of single larvae at 5 dpf were loaded per lane. (D) To confirm frameshift mutations in F0 crispants, amplified target loci were cloned into TOPO-vectors and multiple (>24) cloned alleles were sequenced and aligned. Representative sequence alignment shows insertion and/or deletion events at the target site. We sequenced five mixed F0 crispants and confirmed >63% mosaicism for *sema6ba*-ex.2, *sema6bb*-ex.2, *sema6ba*-ex.17 and *sema6bb*-ex.17. Injection of two crRNAs targeting *sema6ba* exon 17 and *sema6bb* exon 17 resulted in more extended deletions. The protospacer adjacent motif (PAM) is shown by a black box and the crRNA sequence is underlined. Ref. indicates the reference sequence. Yellow dashes represent nucleotide deletions.

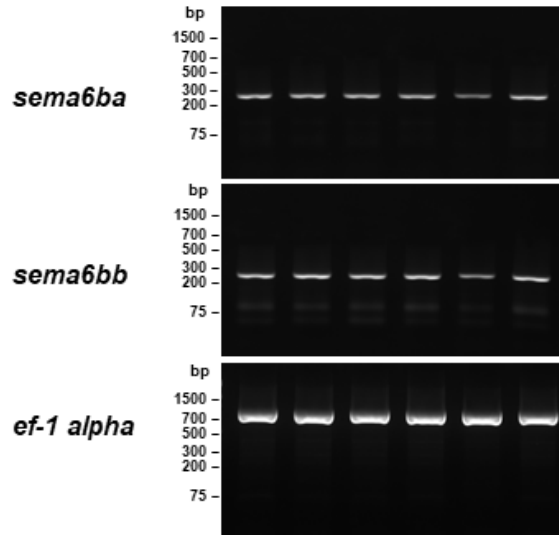

|                              |   |   |   |   |   |   |
|------------------------------|---|---|---|---|---|---|
| DMSO                         | - | - | - | + | + | + |
| NMDi14                       | + | + | + | - | - | - |
| crRNA <i>sema6ba/b-ex.2</i>  | - | + | - | - | + | - |
| crRNA <i>sema6ba/b-ex.17</i> | - | - | + | - | - | + |

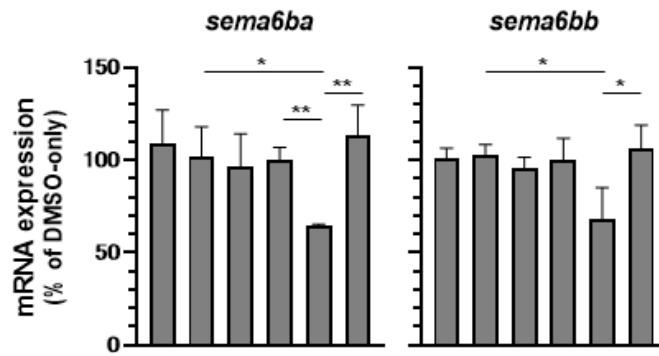

|                              |   |   |   |   |   |   |   |   |   |   |   |   |
|------------------------------|---|---|---|---|---|---|---|---|---|---|---|---|
| DMSO                         | - | - | - | + | + | + | - | - | - | + | + | + |
| NMDi14                       | + | + | + | - | - | - | + | + | + | - | - | - |
| crRNA <i>sema6ba/b-ex.2</i>  | - | + | - | - | + | - | - | + | - | - | + | - |
| crRNA <i>sema6ba/b-ex.17</i> | - | - | + | - | - | + | - | - | + | - | - | + |

**Figure S8. Reduction of transcripts in F0 crispants caused by nonsense-mediated mRNA decay (NMD).**

RT-PCR analysis of *sema6ba* and *sema6bb* transcripts in F0 crispants treated with NMD inhibitor (NMDi14). Three larvae at 6 dpf were mixed. The *sema6ba/b*-ex.2 crispants treated DMSO (vehicle) alone showed *sema6ba* and *sema6bb* transcripts levels (as a control). Zebrafish *sema6ba* and *sema6bb* transcripts levels were evaluated by three independent RT-PCR (bar graphs at the bottom). Each mRNA expression ratio was normalized by *ef-1 alpha*. Data are represented as the mean  $\pm$  s.d. Only statistically significant difference between bars are marked with \* ( $P < 0.05$ ) and \*\* ( $P < 0.01$ ) by Student's *t*-test.



Table S1 DNV rate at the whole coding region of each transcript

See a separate Excel file.

Table S2 DNV rate at NMD(-) region of each transcript

See a separate Excel file.

Table S3 Summary of truncating DNVs at NMD(-) regions in 346 DEE trios

See a separate Excel file.

Table S4 Summary of annotations of cell clusters (Zeisel et al., 2018)

See a separate Excel file.

Table S5 Summary of annotations of cell clusters (Rosenberg et al., 2018)

See a separate Excel file.

Table S6 Oligos for crRNA and primers used for target amplification in the zebrafish study.

| Oligo name                   | Sequence (5' to 3')         |
|------------------------------|-----------------------------|
| <i>sema6ba</i> ex.2 crRNA    | TTTAATCTCCGCCCCCGCTG        |
| <i>sema6bb</i> ex.2 crRNA    | TCAGTGCGGACGAAGTTCAG        |
| <i>sema6ba</i> ex.17 crRNA-1 | CTGGTGTGGGAAGTAGACCT        |
| <i>sema6ba</i> ex.17 crRNA-2 | GAAACCACTCTCCGTCGGTC        |
| <i>sema6bb</i> ex.17 crRNA-1 | GATCTGGCTTAGGTAGTCGT        |
| <i>sema6bb</i> ex.17 crRNA-2 | TCATCTCACAGACTGCGACT        |
| <i>sema6ba</i> ex.2 HMA-F    | ACTTCTCATGTCTTCTTGTGTCTCTGC |
| <i>sema6ba</i> ex.2 HMA-R    | TGCCTAATAATGTCTCTGCTGATGC   |
| <i>sema6bb</i> ex.2 HMA-F    | GGCTCTTTTCTGCATGTTTTTCTA    |
| <i>sema6bb</i> ex.2 HMA-R    | CATGCTCGCTCTGCATAAGA        |
| <i>sema6ba</i> ex.17 HMA-F   | ATGAGCGTATCCCGACACA         |
| <i>sema6ba</i> ex.17 HMA-R   | GGAGGTATGCCATGACTGCT        |
| <i>sema6bb</i> ex.17 HMA-F   | CTGGTGGTGTCTGCAGTTTC        |
| <i>sema6bb</i> ex.17 HMA-R   | TGAAGGTATTTGGAGCTCAGG       |
| <i>sema6ba</i> ex.6 RT-F     | AAACGCTTTCAACCCATTGT        |
| <i>sema6ba</i> ex.8-9 RT-R   | AGGCTCTCGGAACCACTTG         |
| <i>sema6bb</i> ex.6 RT-F     | CCGTTGTGTGCCAATTATACTG      |
| <i>sema6bb</i> ex.8-9 RT-R   | CGCTCACAAAGTATGGCTCTC       |
| <i>efl-alpha</i> RT-F        | ACCACCGGCCATCTGATCTACAAA    |
| <i>efl-alpha</i> RT-R        | ACGGATGTCCTTGACAGACACGTT    |

Table S7. Top five of Pfam protein domains enriched in genes depleted for truncating variants at NMD(-) regions.

| Location      | Pfam protein domain | Pfam accession ID | Odds ratio | P value | Q value |
|---------------|---------------------|-------------------|------------|---------|---------|
| NMD(+) region | KRAB                | PF01352           | 2.2        | 2.3E-07 | 0.0013  |
|               | p450                | PF00067           | 4.9        | 2.8E-06 | 0.0079  |
|               | Filament            | PF00038           | 3.6        | 3.3E-05 | 0.062   |
|               | SCAN                | PF02023           | 4.2        | 4.9E-05 | 0.065   |
|               | Keratin_2_head      | PF16208           | 6.8        | 5.8E-05 | 0.065   |
| NMD(-) region | p450                | PF00067           | 4.8        | 3.6E-06 | 0.014   |
|               | PRY                 | PF13765           | 4.7        | 6.3E-05 | 0.10    |
|               | Fibrinogen_C        | PF00147           | 6.4        | 8.3E-05 | 0.10    |
|               | Filament            | PF00038           | 4.0        | 2.0E-04 | 0.19    |
|               | zf-C2H2_6           | PF13912           | 1.7        | 3.4E-04 | 0.25    |

Table S8. Top five of gene ontology terms enriched in genes depleted for truncating variants at NMD(-) regions.

| GO domain          | GO term accession | GO term name                                                                                          | Odds ratio | P value | Q value |
|--------------------|-------------------|-------------------------------------------------------------------------------------------------------|------------|---------|---------|
| biological_process | GO:0006805        | xenobiotic metabolic process                                                                          | 2.6        | 9.2E-05 | 0.85    |
|                    | GO:1900017        | positive regulation of cytokine production involved in inflammatory response                          | 22.6       | 0.00057 | 1       |
|                    | GO:0009308        | amine metabolic process                                                                               | 15.1       | 0.0013  | 1       |
|                    | GO:0003184        | pulmonary valve morphogenesis                                                                         | 15.1       | 0.0013  | 1       |
|                    | GO:0061077        | chaperone-mediated protein folding                                                                    | 8.1        | 0.0017  | 1       |
| cellular_component | GO:0005576        | extracellular region                                                                                  | 1.4        | 0.00018 | 0.21    |
|                    | GO:0005882        | intermediate filament                                                                                 | 2.4        | 0.00071 | 0.41    |
|                    | GO:0035861        | site of double-strand break                                                                           | 8.8        | 0.0043  | 1       |
|                    | GO:0045111        | intermediate filament cytoskeleton                                                                    | 2.8        | 0.011   | 1       |
|                    | GO:0005579        | membrane attack complex                                                                               | 8.3        | 0.016   | 1       |
| molecular_function | GO:0016705        | oxidoreductase activity, acting on paired donors, with incorporation or reduction of molecular oxygen | 3.2        | 0.00014 | 0.39    |
|                    | GO:0003824        | catalytic activity                                                                                    | 1.6        | 0.00022 | 0.39    |
|                    | GO:0004346        | glucose-6-phosphatase activity                                                                        | Infinite   | 0.00061 | 0.70    |
|                    | GO:0016787        | hydrolase activity                                                                                    | 1.8        | 0.00097 | 0.84    |
|                    | GO:0005506        | iron ion binding                                                                                      | 2.1        | 0.0012  | 0.85    |

## **Supplemental materials and methods**

### **Studied cohort**

This study was approved by the institutional review board of Yokohama City University School of Medicine (Yokohama, Japan). All individuals analyzed here were sent to our department to perform whole exome sequencing (WES) analysis for their genetic diagnosis. First, to optimize DNV detection flow and adjustment of expected DNV rate with depth, we analyzed a data set of 1,330 trios with variable rare diseases (such as DEE, multi-malformation syndrome, mitochondrial disease, congenital myopathy, Charcot-Marie-Tooth disease, hemophilia, Ehler-Danlos syndrome, etc). The inclusion criteria were that 1) the child was diagnosed by attending physicians, 2) the parents were healthy, 3) all three members in each trio were analyzed by WES with the same capture kit (i.e. SureSelect Human All Exon V4, V5, or V6) and 4) parentage between children and their parents was confirmed by calculation of PI-HAT with WES data using PLINK as previously described (data not shown).<sup>1,2</sup> We extracted data of 346 DEE trios from the above 1,330 trio analysis to identify candidate variants causative for DEE. A part (n=195) of probands of the 346 trios were analyzed in our previous paper which focused on ultra-rare variants, but not DNV.<sup>1</sup>

We also analyzed independent 1,406 DEE individuals to screen variants in candidate genes. The inclusion criteria of the 1,406 DEE individuals were that 1) the individual was diagnosed as DEE by attending physicians and 2) samples of either or both the parents were lacking or available samples of the parents were not analyzed by WES or all three members in each trio were not analyzed by WES with the same capture kit.

### **Genetic drift simulation**

We performed genetic drift simulation using a previously reported C++ script.<sup>3</sup> The script generates the number variant sites (N) observed in 33,370 individuals (the number non-Finnish Europeans in ExAC) in the last generation after mutation and selection events

repeated in an effective population size of 100,000 through 1,000,000 generations. The selection event was modeled by Wright-Fisher sampling. We set the following parameters: selection coefficient=0; dominance coefficient=0; per-gene number of possible variant sites=10, 32, 100, 320, or 1000; per-site rate of DNV=3.16e-10, 1.0e-9, 3.16e-9, 1.0e-8, 3.2e-8, or 1.0e-7. We repeated simulations of each parameter at least 300 times. We calculated the mean per-gene number of variant sites observed in the last generation across the >300 simulations of each parameter setting. We analyzed correlations between the mean and total DNV rate per gene (= *per-site DNV rate* × *per-gene number of possible DNV sites*).

### **Number of variants in ExAC**

We downloaded files of variants in Exome Aggregation Consortium, ExAC (ExAC.r0.3.nonpsych.sites.vcf.gz) from the ExAC Browser (Beta). We counted variants of 1) passed by variant quality score recalibration (VQSR) filtering, 2) that were bi-allelic, and 3) that were annotated as synonymous by SnpEff. For each gene, we only considered 20,042 transcripts that were protein-coding (-onlyProtein option in SnpEff), canonical (-canon option in SnpEff), and in GENCODE V19 (gencode.v19.annotation.comprehensive.gff3).

### **Per-gene DNV rate**

We downloaded sequences of each exon plus a 40 bp margin of the above 20,042 transcripts from the UCSC Table Browser (track: GENCODE Genes V19; table: Comprehensive). For NMD(-) regions, we downloaded genomic positions of each exon from the UCSC Table Browser (output format: BED). Using these sequences, we generated a VCF file containing all possible variants at each exon plus a 39 bp margin and a tri-nucleotide context (ex. AAA to ATA). For each of the variants, we obtained 1) variant consequence using SnpEff, 2) DNV rate using a previously reported table of DNV



rates for each tri-nucleotide context (<https://github.com/pjshort/dddMAPS>), and 3) per-base median depth in ExAC or our cohort (see “Per-base median depth”). Because sequencing depth can affect the number of observed variants, we adjusted the rate of DNV at each site according to per-base median depth as follows: 1)  $0.04 \times \text{depth} + 0.125$  (depth:  $<12.5$ ),  $0.177 \times \log(\text{depth} - 6.29) + 0.302$  (depth:  $>12.5$  and  $<55$ ), or 1 (depth:  $>55$ ) for the analysis of ExAC and 2)  $0.025 \times \text{depth}$  (depth:  $<40$ ) and 1 (depth:  $>40$ ) for the analysis of our 346 DEE trios. The formulas were generated from the curves of median depth and the ratio of DNV rate and observed number of variants (Fig. S2). We summed the depth-adjusted DNV rate of each synonymous, missense, and nonsense variant for each transcript. We calculated DNV rates of frameshift indels by multiplying that of nonsense variants by 1.25, which was the ratio of singleton frameshift to singleton nonsense DNVs found in exome sequencing data from roughly 2,000 autism spectrum disorder subjects and controls.<sup>4</sup> We provide non-depth-adjusted DNV rates for each variant type for the whole coding region or NMD(-) region of 20,042 transcripts for the benefit of readers (Table S1 and S2) because depth is dependent on each sequencing platform.

### **Per-base median depth**

For the purpose of depth adjustment of the DNV rate described above, we used per-base median depth for ExAC samples in `Panel.chr.coverage.txt.gz` downloaded from the ExAC Browser (Beta). For our 346 DEE cohort, we selected 100 random samples analyzed using SureSelect Human All Exon V4, 5, and 6 Kits and calculated the median depth for each of kit using `samtools`.

### **Whole exome sequencing (WES)**

WES was performed as previously described.<sup>5</sup> In brief, DNA was extracted from peripheral blood samples using QuickGene-610L (Fujifilm) according to the manufacturer’s protocols, captured with a SureSelect Human All Exon V4, 5, or 6 Kit

(Agilent Technologies, Santa Clara, CA, USA) and sequenced on an Illumina HiSeq 2500 (Illumina, San Diego, CA, USA) with 101-bp paired-end reads. Among 1,330 trios, we sequenced 121, 886, and 323 trios and among 346 DEE trios we sequenced 16, 196, and 134 trios using V4, 5, and 6 kits, respectively. Reads were aligned to the human reference genome (GRCh37/hg19) using Novoalign v3.02.13. PCR duplicates were removed using Picard. Local realignments around indels and base quality score recalibration were performed with the Genome Analysis Toolkit (GATK) 3.7-0.5. Variants were called by GATK HaplotypeCaller, and their quality score (VQSLOD, variant quality score log-odds) was calculated according to the GATK Best Practices.<sup>6</sup> Variants were annotated based on the canonical transcripts using SnpEff (with the `-canon` and `-onlyProtein` option).<sup>7</sup>

### **Variant filtering and *de novo* calling**

We filtered variants as follows: 1)  $<0.001$  minor allele frequency (MAF) in ExAC and ESP6500, 2) not existing in an in-house database comprising 575 healthy adult Japanese, and 3) called by GATK in any of the probands but not in any of the parents of the 346 DEE trios. The remaining variants were analyzed with one filtering system: DenovoFilters<sup>8</sup> and three scoring systems: TrioDenovo,<sup>9</sup> DNMFILTER,<sup>10</sup> and Denovogear.<sup>11</sup> We set the threshold of VQSLOD and the scores of the three systems as follows: VQSLOD:  $>-7.18$ , TrioDenovo:  $>5.72$ , DNMFILTER:  $>0.196$ , and Denovogear:  $>0.02$  for SNVs; VQSLOD:  $-1.06$  and TrioDenovo:  $>5.5$ , for indels.

### **Per-gene enrichment analysis of DNVs**

Enrichment of DNVs was analyzed by testing the null hypothesis that the observed number of DNVs is equal to  $\lambda$ , the expected number of DNVs under the Poisson distribution.<sup>8</sup> The observed DNVs indicate those detected in the flow described above (see “Variant filtering and *de novo* calling”). The expected number of DNVs was

calculated as: (per-gene rate of DNV)  $\times$  (number of analysed trios)  $\times$  2. We regarded stop-gained, canonical splice-site, and frameshift variants as truncating variants. The exome-wide threshold for statistical significance was Bonferroni-corrected for the total number of analyzed genes:  $0.05/20,042$  ( $=2.5E-6$ ). To obtain expected number of DNV across 346 DEE trios, independent 1,406 DEE individuals, and 4,293 DDD individuals, we calculated as follows: (non-depth-adjusted rate of truncating DNV in NMD(-) region of per chromosome per generation:  $6.18E-7$ )  $\times$  (number of individuals:  $346 + 1,406 + 4,293$ )  $\times$  (number of chromosome per individual: 2).

### **Sanger sequencing**

*SEMA6B* variants were confirmed by Sanger sequencing using standard methods. Briefly, PCR products were purified with alkaline phosphatase and exonuclease 1 and sequenced using a BigDye Terminator v3.1 Cycle Sequencing kit (Applied Biosystems, Foster City, CA, USA) on a 3500 DNA Sequencing Analyzer (Life Technologies, Carlsbad, CA, USA).

### **RNA analysis**

To examine if candidate pathogenic DNVs induce NMD, we performed Sanger sequencing using complementary DNA (cDNA) reverse transcribed from total RNA of Individual 2. First, lymphoblastoid cell lines (LCLs) of Individual 2 were maintained in Roswell Park Memorial Institute 1640 medium supplemented with 10% fetal bovine serum, 8  $\mu\text{g/ml}$  tylosin (Sigma-Aldrich, St. Louis, MO, USA), and antibiotic-antimycotic solution in a 5%  $\text{CO}_2$  incubator. Total LCL RNA was obtained using an RNeasy Plus Mini Kit (Qiagen). First strand cDNA was synthesized using the SuperScript III First-Strand Synthesis System (Invitrogen). The synthesized cDNA was amplified by PCR with specific primers (forward 5' -GGGACTGCACAGGACTCC-3' and reverse 5' -AGCAGGGCCTCCGGGGGAA-3') and subsequently used for Sanger sequencing.

### **Single cell RNA sequencing (scRNA-seq) analysis of mouse brain**

We reanalyzed two public data sets of mouse brain scRNA-seq: 1) variable brain regions of at least two P12-60 mice<sup>12</sup> and 2) variable brain regions of one P2 and one P11 mouse.<sup>13</sup> In each original paper, the quality of each cell was checked, and cell type of each cell was annotated. Because evidence for the annotation of each cell cluster was not fully publically available, we confirmed the appropriateness of cell cluster annotations by review of marker gene expression studies and the Allen Mouse Brain Atlas (Table S4 and S5). We analyzed cells using Seurat according to the developers' guide.<sup>14</sup> Briefly, we normalized numbers of unique molecular identifiers (nUMIs) of each gene by total nUMIs in each cell, multiplied by a scale factor (10,000), log-transformed, and linear-regressed by total nUMIs and mitochondrial gene expression level. The residuals of linear-regression were scaled, and the Z-score of the residuals were used as expression levels. We analyzed the percentage of *Sema6b*-expressing cells and mean *Sema6b* expression in each cell type using DotPlot function.

### **Bulk RNA-seq and snRNA-seq analysis of human brain**

We analyzed public data of bulk RNA-seq of variable regions of human brain at variable stages of development in BrainSpan Atlas of the Developing Human Brain (<https://www.brainspan.org/static/download.html>). RPKM values of *SEMA6B* in each region of human brain at each developmental stage were downloaded. When multiple samples (donors) were available for a brain region and a developmental stage, RPKM values were averaged among the multiple samples. We omitted data of a developmental stage when no sample was available in most brain regions or a brain region where no samples was available in most developmental stages. We also analyzed public data of snRNA-seq of variable cell types of adult human brain in Allen Brain Map (<https://portal.brain-map.org/atlas-and-data/rnaseq>). The snRNA-seq data contained

about 49,000 cells from variable brain regions (middle temporal gyrus, anterior cingulate gyrus, primary visual cortex, primary motor cortex, primary somatosensory cortex and primary auditory cortex) of three donors (a 43-year female, a 50-year male, and a 54-year male). Log<sub>2</sub>(CPM) values of *SEMA6B* in each of cell type were downloaded and shown as expression levels. A gene count-cell matrix was downloaded, and proportions of cells expressing at least one count of *SEMA6B* in each cell type was calculated.

### **Protein domain and gene ontology analysis**

We analyzed whether specific protein domains and gene ontology terms are enriched among genes depleted for truncating variants at NMD(-) regions. A previous research analyzed WES data of control populations in ExAC (n=60,706) or ARIC (Atherosclerosis risk in communities study, n=10,940) and detected 1,996 transcripts depleted for truncating variants at NMD(-) regions.<sup>15</sup> Among the 1,996 transcripts, we analyzed 1,594 transcripts overlapped with our 20,042 transcripts which are canonical and protein-coding as described above. For protein domain analysis, we downloaded genomic regions annotated with Pfam protein domains from UCSC Table Browser. We annotated NMD(+) or NMD(-) regions of each transcript with overlapping Pfam protein domains. Note that a Pfam protein domain could overlap with both of NMD(+) and NMD(-) region in a transcript. We analyzed genes related to at least one Pfam protein domain: 1,498 genes depleted for truncating variants at NMD(-) regions and the other non-depleted 18,081 genes. We examined statistical significance of enrichment of each Pfam protein domain in NMD(+) or NMD(-) regions among genes depleted for truncating variants at NMD(-) regions (n=1,498) comparing with the other non-depleted genes (n=18,081) using one-sided Fisher's exact test.

For gene ontology analysis, we downloaded gene ontology terms which each transcript (ENST ID) has and evidence code of each term using the biomaRt library in R from the grch37.emsembl.org host. We removed GO terms whose evidence code was ND (no data).

We separately analyzed three domains of GO terms: biological process, cellular component, and molecular function. We analyzed genes related to at least one GO term as follows: 1,208 genes depleted for truncating variants at NMD(-) regions and the other 13,631 genes for GO terms for biological process, 1,347 genes depleted for truncating variants at NMD(-) regions and the other 14,800 genes for GO terms for cellular component, and 1,342 genes depleted for truncating variants at NMD(-) regions and the other 14,513 genes for GO terms for molecular function. For multiple testing, we corrected the thresholds of statistical significance with Benjamini-Hochberg method (thresholds for q value: 0.05). We examined statistical significance of enrichment of each GO term among genes depleted for truncating variants at NMD(-) regions comparing with the other genes using one-sided Fisher's exact test.

## **Zebrafish Studies**

### **Zebrafish maintenance and ethics**

Wild-type zebrafish, *Danio rerio*, were obtained from the National Research Institute of Fisheries Science (Yokohama, Japan). Zebrafish were maintained at  $28.5^{\circ}\text{C} \pm 0.5^{\circ}\text{C}$  with a 14 h light/10 h dark cycle, fed twice a day and maintained in tanks with circulating water. The zebrafish experiments were authorized by the institutional committee on fish experiments of the National Research Institute of Fisheries Science.

### **CRISPR/Cas9 genome editing and T7 endonuclease 1 assay**

The zebrafish genome has two *SEMA6B* orthologs: *sema6ba* (Ensembl ID: ENSDART00000179089.1) and *sema6bb* (Ensembl ID: ENSDART00000161646.1). CRISPR/Cas9 target sites for zebrafish *sema6ba* and *sema6bb* were identified with the CRISPRdirect web tool. The target exons chosen were exon 2 and exon 17 (last exon) (Fig. S6 and Table S6). The individual synthetic CRISPR RNAs (crRNAs) and synthetic transactivating CRISPR RNA (tracrRNA) were obtained from Integrated DNA

Technologies for use with the Alt-R® CRISPR/Cas9 System (IDT, Coralville, IA, USA). Combined multiple guides per target increased genome editing efficiency, two crRNAs for exon 17 were designed and mixed at a 1:1 ratio. To create gRNA complexes, equimolar amounts of crRNA and tracrRNA were resuspended to 3  $\mu$ M in nuclease-free duplex buffer (IDT) and heated to 95°C for 5 min according to the manufacturer's specifications. Cas9 protein (Alt-R® S.p. Cas9 Nuclease 3NLS, IDT) was diluted to a working concentration (0.5  $\mu$ g/ $\mu$ l) using Cas9 working buffer (20 mM HEPES; 150 mM KCl, pH 7.5). Cas9 protein was combined with gRNA complexes to form ribonucleoprotein (RNP) complexes and incubated at 37°C for 10 min. RNP complexes were injected into one-cell stage embryos for genome editing. To detect mutations using the T7 endonuclease I (T7E1) assay, the DNA fragments containing the targeted sites were amplified from genomic DNA using primer pairs (Table S6). Annealed PCR products were then digested with 5U of T7E1 for 2 h at 37°C. The T7E1-digested products were separated by agarose gel electrophoresis.

### **Heteroduplex mobility assay (HMA)**

PCR at the target sites were performed with TaKaRa Ex Taq (TaKaRa, Shiga, Japan) and the locus-specific primers listed in the Table S6. The PCR amplicons were electrophoresed on a 15% polyacrylamide gel (Wako, Osaka, Japan).

### **RT-PCR and pharmacological treatment**

To inhibit NMD, 72 hpf uninjected, sema6ba/b-ex.2 and sema6b/a-ex.17 F0 crispants were treated with 10  $\mu$ M NMDi14 (SML1538) (Sigma-Aldrich) or DMSO (as a vehicle), and three days later, larvae were collected in TRIzol (Thermo Fisher Scientific, Waltham, MA, USA) for RT-PCR.<sup>16</sup> The cDNA was synthesized using M-MLV reverse transcriptase (Promega, Madison, WI, USA), followed by PCR with ExTaq (Takara). As for the internal control primers, ef1-alpha were used. Primer sets shown in Table S6.



### **Whole-mount immunohistochemistry**

For acetylated tubulin staining, 55 hpf embryos were fixed in Dent's fixative (80% methanol and 20% dimethyl sulphoxide) overnight at 4°C. Embryos were permeabilized with proteinase K followed by post-fixation with 4% PFA and washing with PBSTX (PBS containing 0.5% Triton X-100). After treating with 4% normal goat serum (NGS) in PBSTX for 2 h at room temperature, embryos were incubated with mouse anti-acetylated tubulin antibodies (1:1000, T7451, Sigma-Aldrich) in 4% NGS/PBSTX overnight at 4°C.<sup>17</sup> Images were taken using a Fluoview FV1000-D confocal microscope (Olympus Corporation, Hachioji, Tokyo) and quantification of the optic tecta area was performed using a digital fluorescence BZ-X800 microscope (KEYENCE, Osaka, Japan).

### **PTZ-induced seizures**

For the zebrafish seizure model, we followed a previously described method.<sup>18</sup> Briefly, for locomotor tracking, 7 dpf wild-type (uninjected), *sema6ba/b-ex.2* and *sema6ba/b-ex.17* F0 crispant larvae were individually placed in a 96-well plate (1 larva/well) with 250 µl normal bathing medium. The larvae were incubated with 2.5 mM, 5 mM or 15 mM PTZ (pentylentetrazole, P6500, Sigma-Aldrich). Seizure-type locomotor activity was quantified using the DanioVision™ video tracking system (Noldus, Wageningen, The Netherlands) and movement quantification software (EthoVision XT 11, Noldus). Image analysis used a dynamic substitution algorithm with individual frame weight of 5%. Tools for smoothing data to eliminate background noise were used (MDM 0.2 mm). Each treatment contained two different sets of embryos, with each set containing 16 embryos.

### **Statistical analysis**

Statistical analyses were performed with GraphPad Prism 8 software (GraphPad Software, Inc., San Diego, CA, USA) using a chi-square test or Student's t test for qualitative data. Significance for all tests was defined at \*  $P < 0.05$ ; \*\*  $P < 0.01$ ; \*\*\*  $P < 0.0005$ ; \*\*\*\*  $P < 0.0001$ .

### **Code availability**

The codes for analyses in this study are available ([github.com/hamanakakohei](https://github.com/hamanakakohei)).

---

## **Supplemental note**

### **Correlation between total DNV rate per gene and the number of sites of observed variants per gene**

Previously, total synonymous DNV rate per gene expected from a model and the number of sites of observed synonymous variants per gene were correlated in ExAC and gnomAD.<sup>19,20</sup> To generalize this finding, we performed genetic drift simulations which output the number of sites of variants observed in the last generation after *de novo* mutation and selection events repeated through multiple generations.<sup>3</sup> To simulate synonymous DNV events, we set the following parameters: selection coefficient=0 and dominance coefficient=0 where variants are under no natural selection; per-site rate of DNV=3.16e-10, 1.0e-9, 3.16e-9, 1.0e-8, 3.2e-8, or 1.0e-7, which covers DNV rates of single nucleotide variants for variable trinucleotide contexts.<sup>20</sup> The simulation showed that total DNV rate per gene [= (per-site DNV rate) × (per-gene number of DNV sites)] and the number of sites of variants observed in the last generation per gene were correlated among variable settings of per-site DNV rate and per-gene number of DNV sites (on the same line, Fig. S1).

### **Optimization of DNV detection flow**

We optimized our flow for DNV detection using our 1330 trios. In the 1330 trios, we detected a total of 5,581 single nucleotide variants (SNVs) and 596 indel DNV candidate calls violating Mendelian inheritance across the exome (not restricted to the last two exons at this stage). This number is apparently too large given the exonic DNV rate (~one DNV per diploid exome). However, we noticed that these DNV candidate calls contain 115 SNVs and 25 indels previously Sanger-confirmed as true-positive (TP) DNVs. We analyzed the DNV candidate calls with four scoring systems and one filtering system (see Method, “Variant filtering and *de novo* calling”). To maximize the sensitivity for TP DNVs, we determined the threshold of the four scoring systems that did not miss any TP

DNVs. Only one filtering system, DenovoFilter, missed five TP DNVs. After filtering with the five systems, sensitivity was 95.7% (110/115) for SNV TP DNVs and 100% (25/25) for indel TP DNVs. We considered DNV calls that passed the filtering with the three methods were likely true-positive DNVs (DNVs hereafter). Consequently, we observed a total of 2,045 SNVs and 211 indel DNVs in 1330 trios, 542 SNVs and 50 indels in 346 DEE trios (Fig. 1B).

### **Enrichment of specific protein domains or gene ontology terms among genes depleted for truncating variants at NMD(-) regions**

To infer the pathomechanism of truncating DNV at NMD(-) region in *SEMA6B*, we analyzed functional properties of genes depleted for truncating variants at NMD(-) regions. We analyzed enrichment of specific protein domains or gene ontology terms among 1,594 genes depleted for truncating variants at NMD(-) regions in general populations (ExAC or ARIC) as previously reported.<sup>15</sup> We found enrichment of Pfam protein domains at NMD(+) or NMD(-) regions: two domains (KRAB and p450) at NMD(+) region and one domain (p450) at NMD(-) region exceeded a threshold for statistical significance (q-value: 0.05, Table S7). The KRAB domain and highly ranked domains (but not statistically significant) such as SCAN and zf-C2H2\_6 were observed in KRAB-ZFP (zinc finger proteins). The KRAB domain functions as a transcriptional repressor; SCAN domain mediates oligomerization; zf-C2H2 domain locates at C-termini of proteins and binds DNA.<sup>21</sup> Thus, KRAB-ZFP without their C-termini might sequester wild-type one but not bind to DNA and perturb transcriptional repressor activity. Other highly ranked domains (but not statistically significant) such as Filament and Keratin\_2\_head are observed in type 2 keratin proteins. Filament domain functions mediates self-assembly in to filaments; Keratin\_2\_head and Keratin\_2\_tail domains locate at N-termini and C-termini, respectively, and interacts with other proteins.<sup>21</sup> Thus, type 2 keratin proteins without their C-termini could oligomerize with wild-type ones but

not interact with other proteins via their Keratin\_2\_tail domain and might abrogate their functions. P450 domain is seen in CYP450 proteins. CYP450 proteins could oligomerize and exert enzymatic activities using heme bound at their C-termini.<sup>22,23</sup> CYP450 proteins without their C-termini might abrogate their enzymatic activities. We also analyzed enrichment of GO terms about biological process, cellular component, or molecular function, but no terms exceeded a threshold of statistical significance (q-value: 0.05, Table S8). However, GO terms (GO:0005882 and GO:0045111) related to intermediate filament were highly ranked, consistent with the results of above analysis of protein domains (Table S8).

These results might suggest that truncating variants at NMD(-) regions exert the pathogenicity through oligomerization. The pathomechanism might be compatible with *SEMA6B* variants found here because class 6 semaphorin proteins dimerize via the sema domain (Fig. 1F).<sup>24</sup>

---

### **Supplemental references**

1. Takata, A., Nakashima, M., Saito, H., Mizuguchi, T., Mitsuhashi, S., Takahashi, Y., Okamoto, N., Osaka, H., Nakamura, K., Tohyama, J., et al. (2019). Comprehensive analysis of coding variants highlights genetic complexity in developmental and epileptic encephalopathy. *Nat Commun* 10, 2506.
2. Hamanaka, K., Takata, A., Uchiyama, Y., Miyatake, S., Miyake, N., Mitsuhashi, S., Iwama, K., Fujita, A., Imagawa, E., Alkanaq, A.N., et al. (2019). MYRF haploinsufficiency causes 46,XY and 46,XX disorders of sex development: bioinformatics consideration. *Hum Mol Genet* 28, 2319-2329.
3. Fuller, Z.L., Berg, J.J., Mostafavi, H., Sella, G., and Przeworski, M. (2019). Measuring intolerance to mutation in human genetics. *Nat Genet* 51, 772-776.
4. Samocha, K.E., Robinson, E.B., Sanders, S.J., Stevens, C., Sabo, A., McGrath, L.M., Kosmicki, J.A., Rehnstrom, K., Mallick, S., Kirby, A., et al. (2014). A framework for the interpretation of de novo mutation in human disease. *Nat Genet* 46, 944-950.
5. McKenna, A., Hanna, M., Banks, E., Sivachenko, A., Cibulskis, K., Kernytsky, A., Garimella, K., Altshuler, D., Gabriel, S., Daly, M., et al. (2010). The Genome Analysis Toolkit: a MapReduce framework for analyzing next-generation DNA sequencing data. *Genome Res* 20, 1297-1303.
6. DePristo, M.A., Banks, E., Poplin, R., Garimella, K.V., Maguire, J.R., Hartl, C., Philippakis, A.A., del Angel, G., Rivas, M.A., Hanna, M., et al. (2011). A framework for variation discovery and genotyping using next-generation DNA sequencing data. *Nat Genet* 43, 491-498.
7. Cingolani, P., Platts, A., Wang le, L., Coon, M., Nguyen, T., Wang, L., Land, S.J., Lu, X., and Ruden, D.M. (2012). A program for annotating and predicting the effects of single nucleotide polymorphisms, SnpEff: SNPs in the genome of *Drosophila melanogaster* strain w1118; iso-2; iso-3. *Fly (Austin)* 6, 80-92.

8. JF, M., S, C., TW, F., J, K., E, P., D, R., A, S., S, A., N, A., M, A., et al. (2017). Prevalence and architecture of de novo mutations in developmental disorders. *Nature* 542, 433-438.
9. Wei, Q., Zhan, X., Zhong, X., Liu, Y., Han, Y., Chen, W., and Li, B. (2015). A Bayesian framework for de novo mutation calling in parents-offspring trios. *Bioinformatics* 31, 1375-1381.
10. Liu, Y., Li, B., Tan, R., Zhu, X., and Wang, Y. (2014). A gradient-boosting approach for filtering de novo mutations in parent-offspring trios. *Bioinformatics* 30, 1830-1836.
11. Ramu, A., Noordam, M.J., Schwartz, R.S., Wuster, A., Hurles, M.E., Cartwright, R.A., and Conrad, D.F. (2013). DeNovoGear: de novo indel and point mutation discovery and phasing. *Nat Methods* 10, 985-987.
12. Zeisel, A., Hochgerner, H., Lonnerberg, P., Johnsson, A., Memic, F., van der Zwan, J., Haring, M., Braun, E., Borm, L.E., La Manno, G., et al. (2018). Molecular Architecture of the Mouse Nervous System. *Cell* 174, 999-1014.e1022.
13. Rosenberg, A.B., Roco, C.M., Muscat, R.A., Kuchina, A., Sample, P., Yao, Z., Graybuck, L.T., Peeler, D.J., Mukherjee, S., Chen, W., et al. (2018). Single-cell profiling of the developing mouse brain and spinal cord with split-pool barcoding. *Science* 360, 176-182.
14. Butler, A., Hoffman, P., Smibert, P., Papalexi, E., and Satija, R. (2018). Integrating single-cell transcriptomic data across different conditions, technologies, and species. *Nat Biotechnol* 36, 411-420.
15. Coban-Akdemir, Z., White, J.J., Song, X., Jhangiani, S.N., Fatih, J.M., Gambin, T., Bayram, Y., Chinn, I.K., Karaca, E., Punetha, J., et al. (2018). Identifying Genes Whose Mutant Transcripts Cause Dominant Disease Traits by Potential Gain-of-Function Alleles. *Am J Hum Genet* 103, 171-187.



16. El-Brolosy, M.A., Kontarakis, Z., Rossi, A., Kuenne, C., Gunther, S., Fukuda, N., Kikhi, K., Boezio, G.L.M., Takacs, C.M., Lai, S.L., et al. (2019). Genetic compensation triggered by mutant mRNA degradation. *Nature* 568, 193-197.
17. Tsurusaki, Y., Koshimizu, E., Ohashi, H., Phadke, S., Kou, I., Shiina, M., Suzuki, T., Okamoto, N., Imamura, S., Yamashita, M., et al. (2014). De novo SOX11 mutations cause Coffin-Siris syndrome. *Nat Commun* 5, 4011.
18. Baraban, S.C., Taylor, M.R., Castro, P.A., and Baier, H. (2005). Pentylentetrazole induced changes in zebrafish behavior, neural activity and c-fos expression. *Neuroscience* 131, 759-768.
19. Karczewski, K.J., Francioli, L.C., Tiao, G., Cummings, B.B., Alföldi, J., Wang, Q., Collins, R.L., Laricchia, K.M., Ganna, A., Birnbaum, D.P., et al. (2019). Variation across 141,456 human exomes and genomes reveals the spectrum of loss-of-function intolerance across human protein-coding genes. *bioRxiv* doi: <https://doi.org/10.1101/531210>.
20. Lek, M., Karczewski, K.J., Minikel, E.V., Samocha, K.E., Banks, E., Fennell, T., O'Donnell-Luria, A.H., Ware, J.S., Hill, A.J., Cummings, B.B., et al. (2016). Analysis of protein-coding genetic variation in 60,706 humans. *Nature* 536, 285-291.
21. El-Gebali, S., Mistry, J., Bateman, A., Eddy, S.R., Luciani, A., Potter, S.C., Qureshi, M., Richardson, L.J., Salazar, G.A., Smart, A., et al. (2019). The Pfam protein families database in 2019. *Nucleic Acids Res* 47, D427-d432.
22. Liu, J., Tawa, G.J., and Wallqvist, A. (2013). Identifying cytochrome p450 functional networks and their allosteric regulatory elements. *PLoS One* 8, e81980.
23. Bostick, C.D., Hickey, K.M., Wollenberg, L.A., Flora, D.R., Tracy, T.S., and Gannett, P.M. (2016). Immobilized Cytochrome P450 for Monitoring of P450-P450 Interactions and Metabolism. *Drug Metab Dispos* 44, 741-749.

24. Nogi, T., Yasui, N., Mihara, E., Matsunaga, Y., Noda, M., Yamashita, N., Toyofuku, T., Uchiyama, S., Goshima, Y., Kumanogoh, A., et al. (2010). Structural basis for semaphorin signalling through the plexin receptor. *Nature* 467, 1123-1127.
